Running head: SELF-GENERATION EFFECTS ON MEMORY

1        **Sensory suppression and increased neuromodulation during**  
2        **actions disrupt memory encoding of unpredictable self-**  
3        **initiated stimuli**

4

5        **Nadia Paraskevoudi<sup>a,b</sup> & Iria SanMiguel<sup>a,b,c</sup>**

6

7        *Affiliations:*

8        <sup>a</sup> Institute of Neurosciences, University of Barcelona, Barcelona, Spain

9        <sup>b</sup> Brainlab-Cognitive Neuroscience Research Group, Department of Clinical Psychology  
10        and Psychobiology, University of Barcelona, Barcelona, Spain

11        <sup>c</sup> Institut de Recerca Sant Joan de Déu, Esplugues de Llobregat, Spain.

12

13        *Corresponding author:*

14        Iria SanMiguel

15        Department of Clinical Psychology and Psychobiology

16        P. Vall d'Hebron 171

17        08035 Barcelona, Spain

18        Tel: (0034) 93 312 5050

19        Email: isanmiguel@ub.edu

20

21        ***Declarations of interest: none.***

Running head: SELF-GENERATION EFFECTS ON MEMORY

22 **Abstract**

23 Actions modulate sensory processing by attenuating responses to self- compared to  
24 externally-generated inputs, which is traditionally attributed to stimulus-specific motor  
25 predictions. Yet, suppression has been also found for stimuli merely coinciding with actions,  
26 pointing to unspecific processes that may be driven by neuromodulatory systems.  
27 Meanwhile, the differential processing for self-generated stimuli raises the possibility of  
28 producing effects also on memory for these stimuli, however, evidence remains mixed as to  
29 the direction of the effects. Here, we assessed the effects of actions on sensory processing  
30 and memory encoding of concomitant, but unpredictable sounds, using a combination of self-  
31 generation and memory recognition task concurrently with EEG and pupil recordings. At  
32 encoding, subjects performed button presses that half of the time generated a sound (motor-  
33 auditory; MA) and listened to passively presented sounds (auditory-only; A). At retrieval,  
34 two sounds were presented and participants had to respond which one was present before.  
35 We measured memory bias and memory performance by having sequences where either both  
36 or only one of the test sounds were presented at encoding, respectively. Results showed worse  
37 memory performance – but no differences in memory bias – and attenuated responses and  
38 larger pupil diameter for MA compared to A sounds. Critically, the larger the sensory  
39 attenuation and pupil diameter, the worse the memory performance for MA sounds.  
40 Nevertheless, sensory attenuation did not correlate with pupil dilation. Collectively, our  
41 findings suggest that sensory attenuation and neuromodulatory processes coexist during  
42 actions, and both relate to disrupted memory for concurrent, albeit unpredictable sounds.

43 *Keywords:* self-generation, memory, pupillometry, EEG, auditory processing

44                   **1. Introduction**

45           Forming predictions about upcoming events in the environment is crucial for all behaving  
46 organisms. A critical instance of such predictive processing is our ability to anticipate the  
47 sensory consequences of our own actions, which is essential for building a sense of self and  
48 shapes our perception of sense of agency (Gallagher, 2000). Although predictions have been  
49 suggested to facilitate perceptual processing in the wider sensory literature, most studies from  
50 the action domain point to attenuated processing for the predicted self-produced events  
51 (Schröger et al., 2015; Press et al. 2020), with only a few exceptions showing the opposite  
52 effect (e.g., Reznik et al., 2014; Eliades & Wang, 2008). Several lines of research have shown  
53 that actions suppress the processing of the self-generated reafferent input (so-called self-  
54 generation effect) in a wide range of species (Chagnaud et al., 2015; Kelley et al., 2010; Kim  
55 et al., 2015; Requarth & Sawtell, 2011; Roy et al., 2001; Schneider et al., 2014) and  
56 irrespective of sensory modality (auditory; Baess et al., 2011; Horváth, 2013a; Horváth,  
57 2013b; Martikainen, 2004; Mifsud & Whitford, 2017; SanMiguel et al., 2013; Saupe et al.,  
58 2013; Schafer & Marcus, 1973; Timm et al., 2013; Klaffehn et al., 2019; Weller et al., 2016;  
59 Pyasik et al., 2018, visual; Hughes & Waszak, 2011; Mifsud et al., 2018; Roussel et al., 2013;  
60 Roussel et al., 2014, and tactile; Blakemore et al., 1998; Hesse et al., 2010; Kilteni et al.,  
61 2020). Dominant *cancellation* models attribute this attenuation to stimulus-specific  
62 prediction signals generated via internal forward modelling (Wolpert et al., 1995) before or  
63 during an action that are sent from the motor to the corresponding sensory cortices (Sperry,  
64 1950; von Holst, 1954). These motor-induced predictions of sensory reafference (i.e.,  
65 corollary discharge) are compared to the sensory input generated by one's actions, and only  
66 the difference between the two (i.e., prediction error) is sent to higher stages of the neuronal  
67 hierarchy for further processing (Friston, 2005), ultimately suppressing the processing of the  
68 anticipated event in order to prioritize the most informative unexpected inputs (Sperry, 1950;  
69 von Holst, 1954).

70           So far, self-generation effects in the auditory domain have been typically assessed using  
71 the *contingent* self-generation paradigm, where neural responses to sounds generated by the  
72 participants in a fully predictable fashion are compared to the responses elicited by  
73 externally-generated sounds. Most of these studies have shown attenuated auditory N1 and  
74 P2 event-related potential (ERP) amplitudes, with especially the former being considered a

Running head: SELF-GENERATION EFFECTS ON MEMORY

75 proxy of suppressed processing of self-produced sounds in the auditory cortex, driven by  
76 motor predictions (for a review see Schröger et al., 2015). However, it is known that the  
77 auditory N1 response is not a unitary phenomenon but rather reflects the overlap of several  
78 components (SanMiguel et al., 2013), among which two are proposed to be stimulus-specific  
79 and to reflect processing in primary and secondary auditory areas (Näätänen & Picton, 1987).  
80 The first one is generated by tangentially oriented sources in the auditory cortex, has a  
81 frontocentral distribution, and shows polarity reversal at the mastoids. Nevertheless, the few  
82 studies that have analyzed N1 amplitudes at the mastoids have reported no suppression  
83 (Timm et al., 2013; SanMiguel et al., 2013) or even enhanced amplitude in response to self-  
84 generated sounds (Horváth et al., 2012). The second one, usually referred to as the “T  
85 complex”, is generated by radial sources in the superior temporal gyrus and is typically  
86 identified as the first and second negative peaks (i.e., Na and Tb, respectively) observable on  
87 anterior temporal sites (Toninquist-Uhlen et al., 2003; Wolpaw & Penry, 1975). Reports of  
88 self-generation effects on the “T complex” remain scarce, but the few studies that have  
89 assessed it reported attenuation of Tb for self-generated sounds (Horváth, 2013b; SanMiguel  
90 et al., 2013). Inevitably, if N1-suppression indeed reflects modulations in auditory areas  
91 driven by stimulus-specific motor predictions, then the self-generation effects should be  
92 specific to the expected stimulus and mediated by sensory specific areas.

93 However, the stimulus-specificity of the effects has been challenged by data showing that  
94 the N1-suppression may mostly affect the stimulus-unspecific component of N1 (SanMiguel  
95 et al., 2013), which is thought to be the cortical projection of a reticular process that facilitates  
96 motor activity (Näätänen & Picton, 1987). Further evidence supporting the lack of stimulus-  
97 specificity of the effects comes from work showing that suppression of responses can be also  
98 observed in the absence of a predictive relationship between the action and the sound.  
99 Horváth et al. (2012) employed a *coincidence* rather than a *contingent* task, where  
100 participants had to press a button several times and concurrently, but independently from the  
101 actions, a sound sequence with random between-sound intervals was presented. They showed  
102 that despite the absence of contingent relationship between the action and the sound, the  
103 auditory N1 was attenuated for sounds that coincided with a button press, indicating that the  
104 N1-suppression for self-produced sounds may be also driven by the temporal proximity  
105 between action and sound, rather than by a stimulus-specific prediction of the expected

Running head: SELF-GENERATION EFFECTS ON MEMORY

106 sensory input. These findings challenge the predictions made by the cancellation account,  
107 since if this attenuation was to be attributed to stimulus-specific motor predictions, then it  
108 should only be found in paradigms where the stimulus can be indeed predicted by the action,  
109 and it should mainly reflect the attenuation of the sensory components of N1 (generated in  
110 auditory cortex).

111 Indeed, a significant number of non-predictive processes are also known to modulate  
112 perceptual and neural responses during motor acts (Press et al., 2020; Press & Cook, 2015),  
113 which may point to an unspecific gating mechanism during movement (i.e., a “halo of  
114 neuromodulation”) that modulates processing of sounds presented close in time to a motor  
115 act even in the absence of a causal relationship between the action and the sensory stimulus  
116 (e.g., Hazemann et al., 1975; Makeig et al., 1996; Horváth, 2013a, b; Horváth et al., 2012).  
117 This mechanism may be mediated by arousal-related unspecific modulatory processes which  
118 receive influences from motor areas (Näätänen & Picton, 1987). Specifically, the locus  
119 coeruleus norepinephrine (LC-NE) system has been implicated as a possible reticular  
120 candidate responsible for mediating the unspecific gating of sensory processing around the  
121 motor acts. Supporting evidence comes from animal work showing that the auditory cortex  
122 receives inputs from both motor and neuromodulatory areas (mostly from the basal  
123 forebrain), which are simultaneously active during movement and form synapses onto many  
124 of the same auditory cortical excitatory and inhibitory neurons (Nelson & Mooney, 2016; for  
125 a review see Schneider & Mooney, 2018). Critically, the neurons in the basal forebrain  
126 receive inputs from subcortical regions, including the locus coeruleus, suggesting that this  
127 overlap of motor and neuromodulatory inputs in auditory areas may result in a diverse set of  
128 motor and neuromodulatory influences, thereby pointing to coexisting, but possibly  
129 independent, stimulus-specific and unspecific effects during movement (Nelson & Mooney,  
130 2016). More importantly, the link between LC-NE activity and motor behavior is supported  
131 by animal (Lee & Margolis, 2016; McGinley et al., 2015; Stringer et al., 2019; Vinck et al.,  
132 2015) and human work (Simpson, 1969; Strauch et al., 2020; Yerba et al., 2019) showing a  
133 close association between engaging in motor activities (e.g., whisking or button press in  
134 Go/No-Go tasks) and pupil dilation, which has been shown to track the activity of the LC-  
135 NE system (Aston-Jones & Cohen, 2005; Vinck et al., 2015).

Running head: SELF-GENERATION EFFECTS ON MEMORY

136        Although most studies have focused on the effects of self-generation on the immediate  
137 sensory processing, previous work has reported modulatory effects of movements on  
138 hippocampal and parahippocampal activity (Halgren, 1991; Mukamel et al., 2010; Rummell  
139 et al., 2016), suggesting that the differential processing of self- and externally-generated  
140 stimuli may also have consequences for memory encoding. One line of evidence shows that  
141 spoken words are better remembered than words that are passively listened to (MacDonald  
142 & MacLeod, 1998) and played melodies can be better recognized compared to melodies that  
143 are passively presented to the participants (Brown & Palmer, 2012), suggesting that self-  
144 generated stimuli are encoded more efficiently in memory than the passively presented ones  
145 (so-called *production effect*). These memory improvements for self-produced stimuli have  
146 been attributed to the increased distinctiveness of those items because producing them  
147 provides extra mnemonic information (i.e., a memory trace of having spoken the words) that  
148 is not present for silently read words (Conway & Gathercole, 1987; Mama & Icht, 2016;  
149 Ozubko et al., 2012). Additional evidence suggests that the action-induced memory  
150 enhancement may be driven by the engagement of the noradrenergic system, as shown by  
151 the increased pupil dilation and locus coeruleus activity in response to stimuli tied with – but  
152 not produced by – actions (i.e., Go-events in a Go/No-Go task; Yerba et al., 2019). However,  
153 predictive coding theories suggest that learning and memory are driven by the amount of  
154 surprise (i.e., prediction error) associated with an item (Bar, 2009; Krawczyk et al., 2017;  
155 Pine et al., 2018). Specifically, the larger prediction errors elicited by unpredicted items at  
156 encoding are thought to result in greater synaptic change, reduced prediction error for this  
157 item at retrieval (Greve et al., 2017; Heilbron & Chait, 2018; Henson & Gagnepain, 2010;  
158 Pine et al., 2018), and ultimately enhanced memory performance. The latter findings are  
159 consistent with studies reporting that items leading to high prediction error tend to produce  
160 greater hippocampus fMRI signal in the study phase of a recognition memory experiment,  
161 and that this increase in hippocampal activity is associated with enhanced subsequent  
162 recollection in the test phase (Gagnepain et al., 2011; Henson & Gagnepain, 2010; Pine et  
163 al., 2018). In sum, this framework would predict memory enhancements for the externally-  
164 generated sounds in a typical *contingent* paradigm where they inherently elicit larger  
165 prediction error compared to the more predictable self-generated stimuli.

Running head: SELF-GENERATION EFFECTS ON MEMORY

166 To the best of our knowledge, there have been no attempts to simultaneously address the  
167 effects of self-generation on sensory processing and memory encoding of sounds and assess  
168 the possible relationship between these two phenomena. Meanwhile, the findings as to the  
169 direction of the motor-driven effects on memory encoding of self-generated stimuli  
170 (enhanced vs. reduced memory performance) remain mixed but point to differential memory  
171 representations for events that have been experienced as self-initiated and those that have  
172 been experienced as externally-generated. Further, recent evidence contradicts the traditional  
173 view of sensory suppression being due to stimulus-specific motor predictions, thereby raising  
174 the need to examine the possible role of stimulus-unspecific neuromodulatory mechanisms  
175 both on sensory processing and memory encoding of sounds merely coinciding with motor  
176 actions.

177 In this study, we examined whether and how motor actions affect sensory processing and  
178 memory encoding of concomitant, but unpredictable sounds, by employing a combination of  
179 a self-generation and memory recognition task, while monitoring the brain's and the pupil's  
180 responses to sounds that were either presented passively or that coincided in time with a  
181 motor act. The aim of this study was twofold: First, we aimed to clarify the role of the  
182 neuromodulatory LC-NE system in the motor-driven modulation of auditory processing of  
183 self-generated sounds. Based on previous work, we expected to replicate the sensory  
184 suppression effects when sounds merely coincide with, rather than being predicted by the  
185 action. Thus, we expected to observe typical self-generation effects at encoding (i.e.,  
186 attenuated N1, P2, Tb responses and enhanced P3, Hórvath et al., 2012; SanMiguel et al.,  
187 2013). Moreover, we hypothesized that these typical self-generation effects are related to  
188 neuromodulatory processes, thus we expected them to correlate with increased pupil diameter  
189 for motor-auditory events (McGinley et al., 2015; Yerba et al., 2019). Second, we sought out  
190 to examine whether the differential sensory processing of stimuli paired with an action affects  
191 their encoding in memory. To this end, we examined whether coincidence with an action at  
192 encoding enhances or impairs memory recall at retrieval, and we hypothesized that the  
193 potential differences in the memory encoding of sounds presented with or without a  
194 concomitant action should be driven by, and thus correlate with, the differential  
195 neurophysiological responses (i.e., event-related potentials and pupil diameter) at encoding  
196 for sounds that were either paired with an action or not.



197 **2. Methods**

198 **2.1. Participants**

199 Twenty-six healthy, normal-hearing subjects, participated in the present study.  
200 Participants were typically undergraduate university students at the University of Barcelona.  
201 Data from three participants had to be excluded due to technical problems, inability to comply  
202 with the task instructions, or excessive artifacts in the EEG recording, leaving data from  
203 twenty-three participants (6 men, 17 women,  $M_{age} = 24.82$ , age range: 21-36). None of them  
204 had any hearing impairments, suffered, or had suffered from psychiatric disorders or had  
205 taken substances affecting the central nervous system the 48 hours prior to the experiment.  
206 All participants gave written informed consent for their participation after the nature of the  
207 study was explained to them and they were monetarily compensated (10 euros per hour).  
208 Additional materials included a personal data questionnaire, a data protection document, and  
209 five personality trait questionnaires. The study was accepted by the Bioethics Committee of  
210 the University of Barcelona.

211

212 **2.2. General experimental design**

213 Each trial consisted of three phases: the encoding phase, the retention phase and the  
214 retrieval phase.

215 *Encoding phase:* At the start of each trial, subjects were presented with a row of six  
216 vertical lines on the screen, separated in semi-random distances from each other. The  
217 positions of vertical lines were distributed based on the sequence presented in each trial.  
218 During the whole duration of the encoding period (12 seconds), a horizontal line moved at a  
219 stable pace across the screen from left to right, intersecting each of the vertical lines as it  
220 advanced. Participants were asked to press a button every time the horizontal line reached  
221 one of the vertical ones. Only half of these presses produced a sound (Motor-auditory event;  
222 MA). The other half did not result in the presentation of a sound (Motor-only event; M).  
223 Additionally, three more sounds were presented passively to the participants without being  
224 triggered by a button press (Auditory-only event; A). Thus, in every trial, the encoding set  
225 consisted of nine events, three motor-only (M) and six sounds (i.e., three of them triggered  
226 by a button and the other three presented passively between presses; MA and A events,  
227 respectively). The event-to-event onset asynchrony varied from 0.8 s to 2.4 s, in steps of 0.05



Running head: SELF-GENERATION EFFECTS ON MEMORY

228 s, while the sound-to-sound onset asynchrony varied between 1.6 and 2.4 seconds in steps of  
229 0.05. Participants were asked to pay attention to all the sounds presented. The encoding phase  
230 finished when the horizontal line had intersected all the vertical ones and arrived at the right  
231 of the screen. If the task was performed correctly (i.e., all required button presses were  
232 performed), the trial continued into the retention phase. Otherwise, an error message  
233 appeared on the screen indicating that the participant did not press the button every time the  
234 horizontal line reached a vertical one, and a new trial began.

235 *Retention phase:* During the subsequent retention phase, participants were presented with  
236 a fixation cross on the screen for 3 s and they were asked to remember all the sounds that  
237 were previously presented in the encoding phase.

238 *Retrieval phase:* In the retrieval phase, participants were presented with two sounds with  
239 a 2 s sound-to-sound onset asynchrony (indicated by the visual stimuli “Sound 1” and “Sound  
240 2”, respectively). Subsequently, a question appeared on the screen, prompting participants to  
241 respond whether the first or the second test sound was presented during the encoding phase.  
242 The response window was 2 seconds. After the end of the response window, a fixation was  
243 presented for 2 seconds (inter-trial interval) before the start of the next trial.

244

## 245 **2.3. Stimuli**

### 246 **2.3.1. Sequences**

247 Two types of sequences were created, differing in whether both or only one of the test  
248 sounds presented at retrieval were also present during the encoding phase. In the “Two Test  
249 Sounds at Encoding” (henceforth 2T; Figure 1) and unbeknownst to the participants, the two  
250 test sounds presented passively at retrieval were also presented in the encoding sequence,  
251 one as a motor-auditory (Encoded as MA) and the other one as an auditory-only event  
252 (Encoded as A). In the “One Test Sound at Encoding” (henceforth, 1T; Figure 1), only one  
253 of the test sounds at retrieval was presented at encoding, either as a MA (Encoded as MA) or  
254 as an A event (Encoded as A), while the other sound was new (New sound). The 1T  
255 sequences were introduced only for the behavioral data and were not used for the EEG and  
256 pupillometry analyses. This design allowed us to have enough trials for Encoded as A and  
257 Encoded as MA sounds at retrieval, keep the experiment’s duration within a reasonable time,  
258 and obtain an additional objective measure of memory performance in the 1T sequences

Running head: SELF-GENERATION EFFECTS ON MEMORY

259 besides the measure of memory bias obtained in the 2T sequences. Five of the 1T sequences  
260 were randomly chosen to be used during the practice block.

261

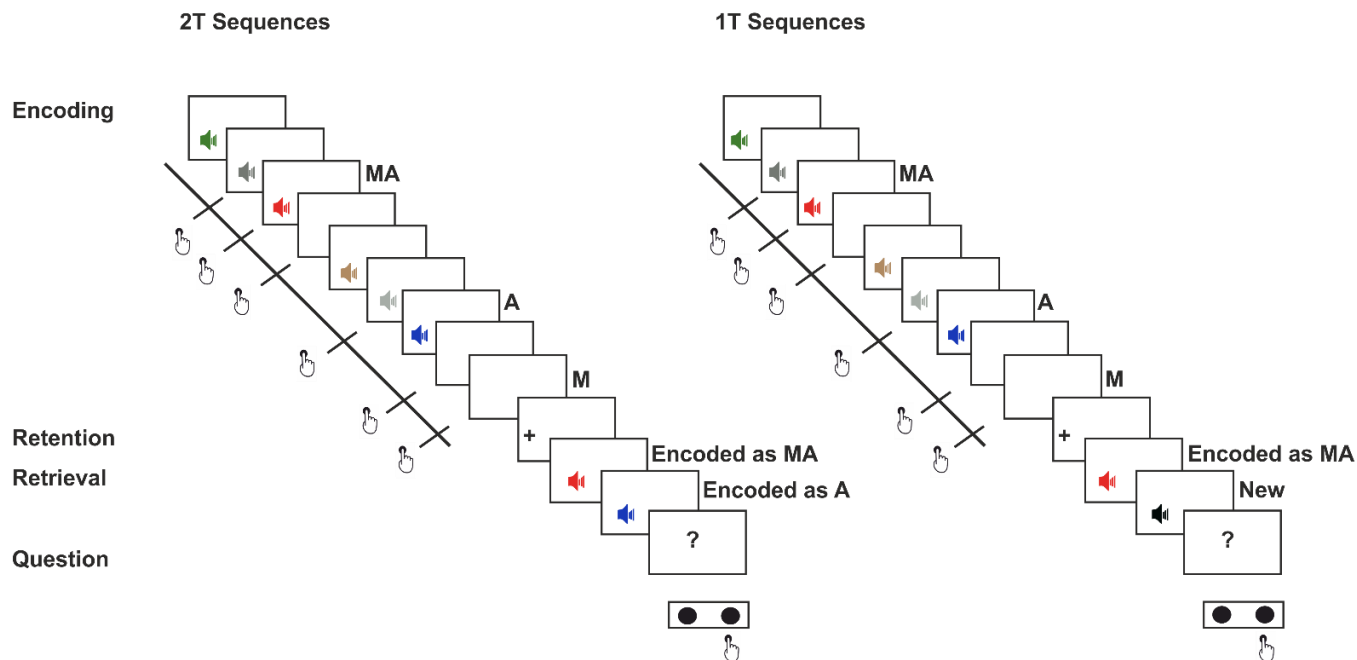

262

263 **Figure 1.** Schematic representation of the experimental design. Each trial consisted of three  
264 phases (encoding, retention, retrieval). During the encoding phase, a horizontal line moved  
265 at a stable pace across the screen from left to right, intersecting each of the six vertical lines  
266 as it advanced. Participants were asked to press a button every time the horizontal line  
267 reached one of the vertical ones. Only half of these presses produced a sound (Motor-  
268 auditory; MA). The other half did not result in the presentation of a sound (Motor-only; M).  
269 Additionally, three more sounds were presented passively to the participants without being  
270 triggered by a button press (Auditory-only condition; A). The encoding phase finished when  
271 the horizontal line had intersected all the vertical ones and arrived at the right of the screen.  
272 During the subsequent retention phase, participants were presented with a fixation cross on  
273 the screen for 3 s and they were asked to remember all the sounds that were previously  
274 presented in the encoding phase. In the retrieval phase, we employed two types of sequences:  
275 2T (left) and 1T (right) sequences. Participants were presented with two sounds separated by  
276 a 2 s sound-to-sound onset asynchrony. In the 2T sequences, both sounds at retrieval were  
277 presented also at encoding, one Encoded as A and the other Encoded as MA. In the 1T  
278 sequences, only one of the two sounds was presented before, either Encoded as A or Encoded  
279 as MA, while the other sound was new. After the presentation of the test sounds, a question  
280 appeared on the screen, prompting participants to respond whether the first or the second test  
281 sound was presented during the encoding phase. The response window was 2 s and the inter-  
282 trial interval was set to 2 s.

283

Running head: SELF-GENERATION EFFECTS ON MEMORY

284       Importantly, the same sounds in the same encoding sequence positions were used as  
285 either A or MA in different trials, which allowed us to compare between physically identical  
286 auditory sequences that only differed in the actions performed. Additionally, we controlled  
287 for the order of the sounds at encoding that would be later used as test at retrieval for the 2T  
288 sequences, the order of the two retrieval sounds, and the position of the test sounds in the  
289 encoding sequence counterbalancing it across trials. Specifically, related to the latter, we  
290 discarded the first and last position of the encoding sequence for placing test sounds to avoid  
291 primacy and recency effects, which refer to an improvement in memory retention for stimuli  
292 that have been presented first or last in a list, respectively (Mondor & Morin, 2004).  
293 However, we included 20 catch trials with test sounds in those positions, which were  
294 randomly interleaved with the experimental sequences described above and discarded from  
295 all analyses.

296

### 297       **2.3.2. Auditory stimuli**

298       For the main experiment, 255 different, environmental, natural, complex, and non-  
299 identifiable sounds were gathered from the libraries of McDermott Sound Library  
300 (<http://mcdermottlab.mit.edu/svnh/Natural-Sound/Stimuli.html>) and Adobe  
301 ([https://offers.adobe.com/en/na/audition/offers/audition\\_dlc.html](https://offers.adobe.com/en/na/audition/offers/audition_dlc.html)). These sounds were then  
302 edited to all have 250 ms of duration, a sampling rate of 44.1 kHz and to be played at 16 bits,  
303 mono and with 50-55 dB of intensity. Subsequently, six volunteers that did not participate in  
304 the main experiment rated the 255 sounds based on their identifiability (i.e., how easy it was  
305 to assign a name to them). All sounds were presented to them in a randomized order and each  
306 sound was presented twice. The volunteers rated them in a scale from 1-3 (1 = identifiable,  
307 2 = not sure, 3 = not identifiable), and the mean score for each sound was calculated. The  
308 108 less identifiable sounds were selected to construct the unique experimental sound  
309 sequences. The sounds used in the practice block consisted of 35 pure tones of different  
310 frequencies, ranging from 300 Hz to 3700 Hz in steps of 100.

311

### 312       **2.4. Apparatus**

313       The visual stimuli were presented on an ATI Radeon HD 2400 monitor. The auditory  
314 stimuli were presented via the Sennheiser KD 380 PRO noise cancelling headphones. To

Running head: SELF-GENERATION EFFECTS ON MEMORY

315 record participants' button presses and behavioural responses, we used the Korg nanoPAD2.  
316 The buttons of this device do not produce any mechanical noise when pressed, and, thus, do  
317 not interfere with our auditory stimuli. The presentation of the stimuli and recording of  
318 participants' button presses and responses were controlled using MATLAB R2017a (The  
319 Mathworks Inc., 2017), the Psychophysics Toolbox extension (Brainard, 1997; Kleiner et al.,  
320 2007; Pelli, 1997), and the Eyelink add-in toolbox for eyetracker control.

321 EEG activity was acquired with Neuroscan 4.4 software and Neuroscan SynAmps RT  
322 amplifier (NeuroScan, Compumedics, Charlotte, NC, USA). We recorded continuously with  
323 Ag/AgCl electrodes from 64 standard locations according to the 10% extension of the  
324 International 10–20 system (Chatrian, Lettich, & Nelson, 1985; Oostenveld & Praamstra,  
325 2001) mounted in a nylon cap (Quick-Cap; Compumedics, Charlotte, NC, USA). An  
326 additional electrode was placed at the tip of the nose (serving as online reference). The  
327 vertical electrooculogram (EOG) was measured with two electrodes placed above and below  
328 the left eye, and the horizontal EOG with two electrodes placed on the outer canthi of the  
329 eyes referenced to the common reference (unipolar montage). The ground electrode was  
330 placed at AFz. All impedances were kept below 10 k $\Omega$  during the whole recording session  
331 and data was sampled at 500 Hz.

332 Concurrently with the EEG recording, horizontal and vertical gaze position, as well as the  
333 area of the pupil, were recorded using EyeLink 1000 desktop mount (SR Research, sampling  
334 rate: 1,000 Hz; left eye recordings except for three participants for whom the right eye was  
335 recorded instead). The pupil was assessed in the centroid mode of the eye tracker, which uses  
336 a center-of-mass algorithm. This algorithm detects the pupil area by identifying the number  
337 of black pixels and its center on the video image. Importantly, in contrast to methods using  
338 ellipse fitting for the measurement of the pupil, this method is hardly affected by noise (S-R  
339 Research Eyelink-CL Manual, p. 71).

340

## 341 **2.5. Procedure**

342 Prior to the start of the experiment, participants were asked to complete several  
343 questionnaires. Subsequently, participants were seated in an electrically and acoustically  
344 shielded room and were asked to place their head on a chinrest at approximately 60 cm from  
345 the screen. Eyetracker calibration was performed first at the start of the experiment and then

Running head: SELF-GENERATION EFFECTS ON MEMORY

346 every six blocks. In order to familiarize themselves with the task, participants first completed  
347 a practice block of 5 trials and repeated it as many times as they needed to make sure they  
348 understood how to perform the task. During the main experiment, participants completed a  
349 total of 236 trials: 56 1T trials, 160 2T trials and 20 catch trials. These were divided in 24  
350 blocks, 20 of them comprised of 10 trials (9 experimental and 1 catch trial) and the remaining  
351 4 comprised of 9 trials (all of them experimental trials). At the end of each block, a message  
352 appeared informing participants about the number of errors (i.e., not pressing the button when  
353 required) and extra-presses (i.e., more than the required button presses) at the encoding phase,  
354 as well as the number of missed responses at retrieval for this block. Catch trials, as well as  
355 trials including errors in button-pressing and missed responses were discarded from further  
356 analyses. Participants took a break of approximately 5 minutes every six blocks to prevent  
357 fatigue. The experiment lasted for approximately 1.5 hour excluding the EEG preparation.

358

## 359 **2.6. Data analysis**

### 360 **2.6.1. Behavioral analysis**

361 To test for differences in memory bias (2T sequences) and memory performance (1T  
362 sequences) for sounds encoded as A or MA, we performed two different analyses. For the 1T  
363 sequences, we calculated the percent correct for the sounds at retrieval (i.e., memory  
364 performance), separately for those that were Encoded as MA and Encoded as A, which was  
365 subsequently submitted to a two-sided paired sample *t*-test. For the 2T-trial sequences, we  
366 calculated the percent recall for sounds Encoded as MA and Encoded as A and tested for  
367 differences in memory bias, using a two-sided paired samples *t*-test. We complemented the  
368 frequentist *t*-tests with corresponding Bayesian *t*-tests, separately for the 1T and 2T  
369 sequences. For both Bayesian comparisons, the Bayes factor ( $BF_{10}$ ) for the alternative  
370 hypothesis (i.e., the difference of the means is not equal to zero) was calculated. Specifically,  
371 the null hypothesis corresponded to a standardized effect size  $\delta = 0$ , and the alternative  
372 hypothesis was defined as a Cauchy prior distribution centered around 0 with a scaling factor  
373 of  $r = 0.707$  (Rouder et al., 2012). In line with the Bayes Factor interpretation (Lee &  
374 Wagenmakers, 2013) and with previous work reporting Bayes Factors (Korka et al., 2019;  
375 Korka et al., 2020; Marzecová et al., 2018), data were taken as moderate evidence for the  
376 alternative hypothesis if the  $BF_{10}$  was greater than 3, while values close to 1 were considered

377 only weakly informative. Values greater than 10 were considered strong evidence for the  
378 alternative (or null) hypothesis.

379

### 380 **2.6.2. EEG preprocessing**

381 EEG data was analyzed with EEGLAB (Delorme & Makeig, 2004) and plotted with  
382 EEProbe (ANT Neuro). Data were high-pass filtered (0.5 Hz high-pass, Kaiser window,  
383 Kaiser  $\beta$  5.653, filter order 1812), manually inspected so as to reject atypical artifacts and  
384 identify malfunctioning electrodes, and corrected for eye movements with Independent  
385 Component Analysis, using the compiled version of runica (binica) that uses the logistic  
386 infomax ICA algorithm (Onton & Makeig, 2006). Components capturing eye movement  
387 artifacts were rejected by visual inspection and the remaining components were then  
388 projected back into electrode space. Data was then low-pass filtered (30 Hz low-pass, Kaiser  
389 window, Kaiser  $\beta$  5.653, filter order 1812), remaining artifacts were rejected by applying a  
390 75  $\mu$ V maximal signal-change per epoch threshold, and malfunctioning electrodes were  
391 interpolated (spherical interpolation). A  $-100$  to  $+500$  ms epoch was defined around each  
392 event both at the encoding and the retrieval phase. The data was subsequently baseline  
393 corrected (100 ms prior to the event). We calculated the average wave for each event of  
394 interest, as well as the grand average for the whole sample. Specifically, we obtained the  
395 averages for the MA, A, and M events at encoding, while for the retrieval data, we binned  
396 the responses to motor-auditory and auditory-only sounds as a function of memory (i.e.,  
397 Encoded as MA and Encoded as A at retrieval that were remembered or forgotten). For each  
398 condition of interest the number of remaining trials used for the analyses after trial rejection  
399 were: Auditory-only ( $M = 424.9$ ,  $SD = 46.9$ ), Motor-auditory ( $M = 427.2$ ,  $SD = 40.6$ ), Motor-  
400 only ( $M = 429$ ,  $SD = 40.8$ ), Encoded as A and forgotten ( $M = 68$ ,  $SD = 11.7$ ), Encoded as A  
401 and remembered ( $M = 64$ ,  $SD = 14.7$ ), Encoded as MA and forgotten ( $M = 64.1$ ,  $SD = 14.2$ ),  
402 Encoded as MA and remembered ( $M = 67.7$ ,  $SD = 11.9$ ).

403 To assess self-generation effects at encoding, MA sound responses were corrected for  
404 motor activity by subtracting the motor-only (M) averages from the motor-auditory (MA)  
405 averages, since the signal obtained in the MA condition represents the brain signal elicited  
406 by the sound, but also by the planning and execution of the finger movement to press the  
407 button. We, therefore, obtained a motor-corrected wave that only included the brain signal



Running head: SELF-GENERATION EFFECTS ON MEMORY

408 elicited by the MA sound. Self-generation effects at encoding were then assessed by  
409 comparing responses to MA sounds corrected for motor activity (MA–M) with the responses  
410 elicited by the auditory-only sounds (A). Self-generation effects are presented in all figures  
411 as the difference wave between the motor-auditory (corrected) sound responses and the  
412 auditory-only sound responses (A–[MA–M]). No motor correction was performed at  
413 retrieval since the Encoded as MA sounds were presented passively.

414

### 415 **2.6.3. ERP analysis**

416 For all the effects of interest at encoding, we examined responses separately for the N1  
417 and P2 at Cz (N1, P2) and at the mastoids (henceforth, N1<sub>mast</sub>, P2<sub>mast</sub>), the P3 component at  
418 Pz, and the N1 subcomponents Na and Tb at T7 and T8. The same components except for P3  
419 were examined at retrieval. The windows were defined after visual inspection of the data by  
420 locating the highest negative or positive (depending on the component of interest) peak in  
421 the usual latencies for each component as reported by previous work (SanMiguel et al., 2013).  
422 Specifically, time windows for N1 (and N1<sub>mast</sub>), P2 (and P2<sub>mast</sub>), Na, and Tb were defined on  
423 the grand-averaged waveforms of the auditory-only sounds as previously reported (e.g.,  
424 SanMiguel et al., 2013). Na and Tb were identified as the first and second negative peaks,  
425 respectively, identifiable after sound onset on electrodes T7 and T8, as recommended by  
426 Tonnquist-Uhlen et al. (2003). N1/N1<sub>mast</sub> and P2/P2<sub>mast</sub> were identified as the negative and  
427 positive peaks occurring in the window ~70 to 150 ms, and ~150 to 250 ms after stimulus  
428 onset on Cz, respectively, showing reversed polarity at the mastoid electrodes. P3 at encoding  
429 was identified as the peak of the difference wave (A – [MA–M]) in the P3 window range  
430 based on previous work (e.g., Baess et al., 2008). The time windows for the N1/N1<sub>mast</sub>,  
431 P2/P2<sub>mast</sub>, P3, Na, and Tb peaks were centered on the identified peaks ± 13, 25, 15, 10, and  
432 15 ms, respectively. For the encoding data, we performed paired samples *t*-tests with the  
433 factor Sound Type (A vs. MA) to test for differences in N1, P2 and P3, and a repeated  
434 measures ANOVA with factors Sound Type (A vs. MA) x Laterality (M1 vs. M2 or T7 vs.  
435 T8) to test for differences in N1<sub>mast</sub>, P2<sub>mast</sub> and Na, Tb, respectively. For the retrieval data we  
436 performed 2x2 ANOVAs with the factors Sound Type (Encoded as A vs. Encoded as MA)  
437 and Memory (Remembered vs. Forgotten) on N1 and P2, while for the N1<sub>mast</sub>, P2<sub>mast</sub>, Na, and



Running head: SELF-GENERATION EFFECTS ON MEMORY

438 Tb an additional factor Laterality was introduced in the ANOVAs (i.e., M1 vs. M2 or T7 vs.  
439 T8).

440

#### 441 **2.6.4. Pupillometry analysis**

442 Missing data and blinks, as detected by the EyeLink software, were padded by 100 ms and  
443 linearly interpolated. Additional blinks were found using peak detection on the velocity of  
444 the pupil signal and linearly interpolated (Urai et al., 2017). Blinks separated by less than 250  
445 ms were aggregated to a single blink. The interpolated pupil time series were bandpass  
446 filtered using a 0.05–4 Hz third-order Butterworth filter. Low-pass filtering reduces  
447 measurement noise not likely to originate from physiological sources, as the pupil functions  
448 as a low-pass filter on fast inputs (Binda et al., 2013; Hoeks & Levelt, 1993). High-pass  
449 filtering removes slow drifts from the signal that are not accounted for by the model in the  
450 subsequent deconvolution analysis. First, we estimated the effect of blinks and saccades on  
451 the pupil response through deconvolution and removed these responses from the data using  
452 linear regression using a procedure detailed in previous work (Knapen et al., 2010; Urai et  
453 al., 2017). The residual bandpass filtered pupil time series was used for the evoked analyses  
454 (van Slooten et al., 2018). After zscoring per trial, we epoched trials (epoching window -0.5  
455 to 1.5 post-event), baseline corrected each trial by subtracting the mean pupil diameter  
456 500 ms before onset of the event and resampled to 100 Hz.

457 For each participant, we first obtained the average evoked response for the main events of  
458 interest. Specifically, we obtained the averages for the A and MA events at encoding, while  
459 at retrieval we obtained the averages for the Encoded as A and Encoded as MA sounds,  
460 separately for the remembered and the forgotten ones. We used non-parametric permutation  
461 statistics to test for the group-level significance of the individual averages, separately for  
462 encoding and retrieval. Specifically, we computed  $t$  values of the difference between the two  
463 conditions of interest and thresholded these  $t$  values at a  $p$  value of 0.05. Each cluster was  
464 constituted by the samples that passed the threshold of the  $p$  value. The cluster statistics was  
465 chosen as the sum of the paired  $t$ -values of all the samples in the cluster. First, we compared  
466 the pupil response to motor-auditory and auditory-only events at encoding. For the retrieval  
467 data, we aimed to test for possible main effects of Sound Type (Encoded as A vs. Encoded  
468 as MA) and Memory (Remembered vs. Forgotten), as well as for possible interactions

Running head: SELF-GENERATION EFFECTS ON MEMORY

469 between the two. For the main effects of Sound Type and Memory at retrieval, the  
470 permutation statistics were performed between Encoded as A and Encoded as MA sounds  
471 (irrespective of their memory) and between Remembered and Forgotten sounds (irrespective  
472 of how they were encoded before), respectively. To test for possible interactions, the cluster-  
473 permutation test was performed on the difference waves ([Encoded as A and remembered –  
474 Encoded as MA and remembered] and [Encoded as A and forgotten – Encoded as MA and  
475 forgotten]). For each statistical test, this procedure was performed by randomly switching  
476 labels of individual observations between these paired sets of values. We repeated this  
477 procedure 10,000 times and computed the difference between the group means on each  
478 permutation. The obtained  $p$  value was the fraction of permutations that exceeded the  
479 observed difference between the means (i.e., two-sided dependent samples tests). The pupil  
480 preprocessing and analysis was performed with custom software based on previous work  
481 (Urai et al., 2017) using Fieldtrip (Oostenveld et al., 2011).

482

#### 483 **2.6.5. Correlations**

484 Finally, we hypothesized that the electrophysiological and neuromodulatory effects at  
485 encoding (i.e., sensory suppression and pupil dilation for MA events) might be driving any  
486 memory encoding differences between A and MA sounds, and that neuromodulation might  
487 be behind the suppression of ERP responses to MA sounds. To assess these relationships, we  
488 tested for possible correlations between the behavioural, electrophysiological and  
489 neuromodulatory (i.e., pupil diameter) effects of actions. Only those differences between MA  
490 and A events that were found to be significant in the previous analyses were introduced in  
491 the correlation analyses. For all the behavioural and the electrophysiological effects, we first  
492 calculated the difference by subtracting the MA from A values (i.e., difference in memory  
493 and ERP amplitude for each component of interest between A and MA). Regarding the ERPs  
494 identified in two electrodes (e.g., Na, Tb, N1<sub>mast</sub>, P2<sub>mast</sub>), we calculated the mean amplitude  
495 across the two (T7/T8 and M1/M2, respectively). For the pupil data, we used the peak of the  
496 difference wave between A and MA events at encoding. We then submitted these values to  
497 a Pearson correlation coefficient to test for correlations between a) the effects on ERPs at  
498 encoding and memory performance/bias (1T and 2T sequences, respectively), b) the  
499 neuromodulatory effects at encoding and memory performance/bias (1T and 2T sequences,

500 respectively), and c) the effects on the ERPs and the neuromodulatory effects at encoding. In  
501 all correlations, for the ERPs, the larger the attenuation effects for the negative (N1, P2<sub>mast</sub>,  
502 Na, Tb) and positive (N1<sub>mast</sub>, P2, P3) components, the more negative and positive the values,  
503 respectively. Conversely, for the pupil and the behavioural data, the more negative the value,  
504 the larger the pupil diameter and the worse the memory performance for MA sounds.

505

### 506 **3. Results**

507 All statistical analyses were performed using R (version 3.6.0). For all the *t*-tests  
508 performed, we first confirmed that the assumption of normality was not violated (Shapiro–  
509 Wilk normality test  $p > .05$ ).

510

#### 511 **3.1. Behavioural performance**

512 For the analysis of the behavioural data, we calculated the percent correct (i.e., memory  
513 performance in the 1T sequences) and the percent recall (memory bias in the 2T sequences)  
514 for sounds that were encoded as motor-auditory or auditory-only (see Figure 2). For the 1T  
515 sequences, we obtained significantly better memory performance for sounds that were  
516 encoded as auditory-only compared to those that coincided with participants' motor acts in  
517 the previous encoding phase,  $t(22) = 3.15$ ,  $p = .005$ ,  $d = 0.66$  ( $M_{MA} = .757$ ,  $M_A = .799$ ,  $SD_{MA}$   
518  $= .108$ ,  $SD_A = .0924$ ). This difference, however, was not reflected in memory bias since we  
519 did not find significant differences between the Encoded as A and Encoded as MA sounds in  
520 the 2T sequences, where both of the test sounds were presented at encoding,  $t(22) = 1.14$ ,  $p$   
521  $= .267$  ( $M_{MA} = .509$ ,  $M_A = .491$ ,  $SD_{MA} = .0395$ ,  $SD_A = .0395$ ). The absence of significant  
522 differences in memory bias may suggest that they remembered both sounds as evident by the  
523 generally high accuracy (i.e., mean performance in the 1T sequences = 0.78 with standard  
524 deviation of 0.1) which led them to choose randomly between A and MA sounds in 2T  
525 sequences. We complemented the frequentist *t*-tests with corresponding Bayesian *t*-tests,  
526 separately for memory performance (1T sequences) and memory bias (2T sequences). The  
527 Bayesian *t*-tests for the 1T and 2T sequences yielded similar results as the ones obtained from  
528 the frequentist *t*-tests. Specifically, this analysis brought strong evidence for the alternative  
529 hypothesis in the case of 1T sequences ( $BF_{10} = 9.375$ ), while the Bayesian *t*-test for the 2T  
530 sequences, brought weak evidence for the alternative hypothesis ( $BF_{10} = 0.389$ ).

Running head: SELF-GENERATION EFFECTS ON MEMORY

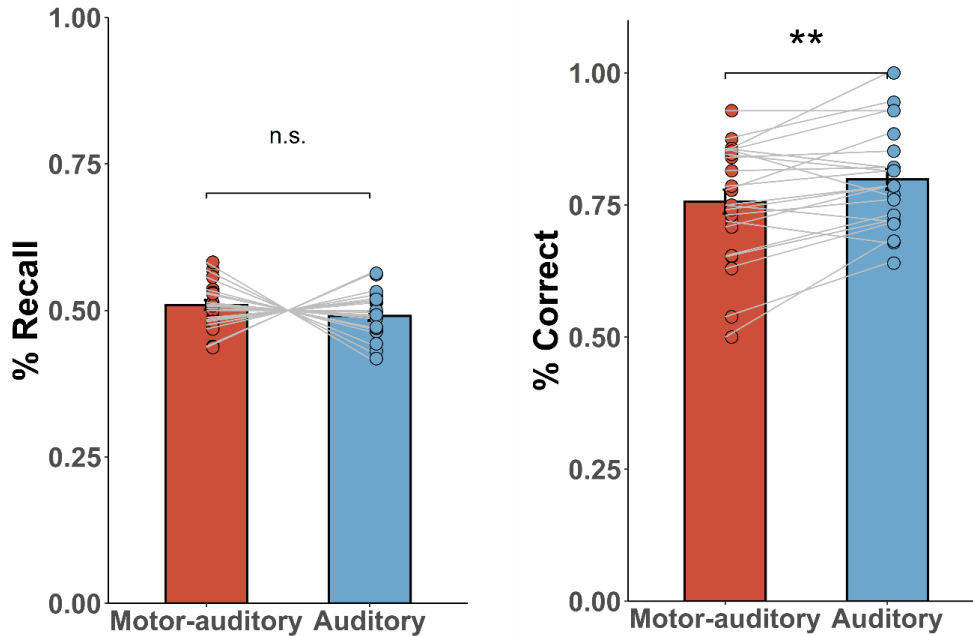

531

532 **Figure 2.** Summary of the behavioural results, separately for memory bias in the 2T  
533 sequences (left) and memory performance in the 1T sequences (right). Error bars depict  
534 standard error of the mean. For memory bias (i.e., percent recall in 2T sequences), there were  
535 no significant differences between motor-auditory and auditory-only sounds (two-tailed  
536 paired samples t-test,  $p > .050$ ,  $M_{MA} = .509$ ,  $M_A = .491$ ,  $SD_{MA} = .0395$ ,  $SD_A = .0395$ ), in line  
537 with the Bayesian analysis that provided weak evidence for the alternative hypothesis  
538 ( $BF_{10} = 0.389$ ). For memory performance (i.e., percent correct in 1T sequences), there was a  
539 significant difference between motor-auditory and auditory-only sounds (two-tailed paired  
540 samples t-test,  $t(22) = 3.15$ ,  $p = .005$ ,  $d = 0.66$ ), with higher accuracy for the latter ( $M_{MA} =$   
541  $.757$ ,  $M_A = .799$ ,  $SD_{MA} = .108$ ,  $SD_A = .0924$ ), which was also supported by the Bayesian  
542 analysis that brought strong evidence in favor of the alternative hypothesis ( $BF_{10} = 9.375$ ).

543

544

### 545 3.2. Electrophysiological responses at encoding

546 Figure 3a shows all the studied peaks identified on the passive sound responses for the  
547 encoding conditions at the relevant electrodes for each peak. The motor-auditory sounds at  
548 encoding were motor corrected (see Methods). The time windows defined for each peak were  
549 the following: Na 72–92 ms, Tb 120–150 ms, N1/N1<sub>mast</sub> 94–120 ms, P2/ P2<sub>mast</sub> 174–224 ms,  
550 P3 256–286.

551 First, we performed a one-sided  $t$ -test to test for possible differences in N1 amplitude  
552 between A and MA sounds at encoding, with the hypothesis of attenuated responses for the  
553 latter. Indeed, we obtained a significant attenuation for the N1,  $t(22) = -1.89$ ,  $p = .036$ ,  $d = -$   
554  $0.39$ , with lower amplitudes for sounds that coincided with a motor act, compared to those

Running head: SELF-GENERATION EFFECTS ON MEMORY

555 that were passively presented to the participants (Figure 3a-b, see Table 1 for all the mean  
 556 amplitudes per condition). We also tested for differences in N1 (with reversed polarity) at  
 557 the mastoids (N1<sub>mast</sub>) using a repeated measures ANOVA with factors Sound Type (MA vs.  
 558 A) and Laterality (M1 vs. M2). We obtained a significant enhancement for the MA sounds  
 559  $F(1, 22) = 15.68, p < .001, \eta_p^2 = .42$ , suggesting that besides the attenuation for MA sounds  
 560 observed at vertex, further modulatory effects of sound-action coincidence occur (Figure 3).  
 561 We also found a significant main effect of Laterality,  $F(1, 22) = 5.96, p = .023, \eta_p^2 = .21$ , with  
 562 lower amplitudes at M1 compared to M2, while the interaction between Sound Type and  
 563 Laterality did not reach significance,  $F(1, 22) = 3.55, p = .073$ .

564

565 **Table 1.** Mean amplitudes and standard deviation per component and condition across 23  
 566 participants.

| Components         | Electrodes | Auditory-only |      | Motor-auditory |      | Encoded as |        | Encoded as |      | Encoded as |            | Encoded as A |            |
|--------------------|------------|---------------|------|----------------|------|------------|--------|------------|------|------------|------------|--------------|------------|
|                    |            | (A)           | (MA) | (MA)           | (MA) | MA and     | MA and | A and      | and  | forgotten  | remembered | forgotten    | remembered |
| N1                 | Cz         | -3.14         | 1.79 | -2.66          | 1.98 | -3.89      | 2.01   | -4.51      | 2.28 | -4.13      | 2.45       | -4.19        | 2.22       |
| P2                 | Cz         | 4.95          | 2.49 | 3.83           | 2.01 | 7.16       | 4.38   | 7.37       | 3.51 | 7.33       | 3.96       | 7.76         | 4.25       |
| P3                 | Pz         | -0.08         | 1.29 | 1.49           | 1.43 | -          | -      | -          | -    | -          | -          | -            | -          |
| N1 <sub>mast</sub> | M1         | 0.26          | 0.87 | 0.67           | 0.84 | 0.51       | 1.33   | 0.27       | 1.02 | 0.59       | 0.95       | 0.53         | 1.29       |
|                    | M2         | 0.43          | 0.99 | 1.03           | 0.98 | 0.65       | 1.12   | 0.61       | 1.41 | 0.83       | 1.38       | 0.86         | 1.33       |
| P2 <sub>mast</sub> | M1         | -0.75         | 0.79 | -0.19          | 0.81 | -1.88      | 1.51   | -2.53      | 1.71 | -2.03      | 1.32       | -2.24        | 1.42       |
|                    | M2         | -0.56         | 1.01 | 0.05           | 0.87 | -2.24      | 1.43   | -2.63      | 1.64 | -2.18      | 1.57       | -2.45        | 1.55       |
| Na                 | T7         | -0.89         | 0.94 | -0.97          | 1.18 | -1.23      | 1.37   | -1.48      | 1.19 | -1.11      | 1.02       | -0.86        | 1.09       |
|                    | T8         | -0.47         | 0.76 | -0.45          | 1.03 | -0.89      | 1.36   | -1.21      | 1.30 | -0.82      | 1.68       | -0.59        | 1.12       |
| Tb                 | T7         | -1.91         | 1.01 | -1.75          | 1.12 | -2.89      | 1.73   | -3.26      | 1.94 | -2.97      | 1.66       | -2.34        | 1.53       |
|                    | T8         | -2.18         | 1.40 | -1.54          | 1.56 | -3.68      | 2.25   | -3.62      | 1.94 | -3.40      | 2.19       | -2.81        | 1.63       |

567

568 Next, we examined the attenuation effects at the N1 subcomponents at temporal sites,  
 569 using a 2x2 ANOVA, with factors Sound Type (A vs. MA) and Laterality (T7 vs. T8) on  
 570 Na and Tb (Figure 3a). For Na, only a significant main effect of Laterality was obtained,  
 571 with lower amplitudes at T8 compared to T7,  $F(1, 22) = 4.82, p = .039, \eta_p^2 = .18$ , while the  
 572 main effect of Sound Type and the interaction did not reach significance,  $F(1, 22) = 0.05, p$

Running head: SELF-GENERATION EFFECTS ON MEMORY

573 = .828 and  $F(1, 22) = 0.35$ ,  $p = .563$ , respectively. For Tb, however, we obtained  
574 significantly lower amplitudes for sounds coinciding with a motor act compared to the  
575 auditory-only ones,  $F(1, 22) = 9.03$ ,  $p = .007$ ,  $\eta_p^2 = .29$ , while the main effect of Laterality  
576 did not reach significance,  $F(1, 22) = 0.03$ ,  $p = .871$ . However, we also found a significant  
577 interaction,  $F(1, 22) = 8.63$ ,  $p = .008$ ,  $\eta_p^2 = .28$ , reflecting that the attenuation for MA  
578 sounds was only significant in T8 but not in T7 (post-hoc t-tests,  $t(22) = -4.06$ ,  $p < .001$ ,  $d =$   
579  $-0.85$  and  $t(22) = -1.04$ ,  $p = .311$ , respectively).

580 Subsequently, we performed a one-sided *t*-test to test for possible differences in P2  
581 amplitudes between A and MA sounds at encoding, with the hypothesis of attenuated  
582 responses for the latter. We obtained a significant P2 attenuation at Cz,  $t(22) = 3.98$ ,  $p <$   
583  $.001$ ,  $d = 0.83$ , with lower amplitudes for sounds that coincided with a motor act, compared  
584 to those that were passively presented to the participants (Figure 3a-b). We also tested for  
585 differences in this component (with reversed polarity) at the mastoids (P2<sub>mast</sub>) using a  
586 repeated measures ANOVA with factors Sound Type (MA vs. A) and Laterality (M1 vs.  
587 M2). We observed a significant attenuation for the MA sounds, replicating the attenuation  
588 observed at Cz,  $F(1, 22) = 34.23$ ,  $p < .001$ ,  $\eta_p^2 = .61$ , as well as a main effect of Laterality,  
589  $F(1, 22) = 4.66$ ,  $p = .042$ ,  $\eta_p^2 = .17$ , with more negative amplitudes at M1 compared to M2.  
590 The interaction of Sound Type and Laterality on P2<sub>mast</sub> did not reach significance,  $F(1, 22)$   
591  $= 0.54$ ,  $p = .470$ . Finally, we also tested for differences in P3 at Pz, which yielded a  
592 significantly larger P3 amplitude for sounds coinciding with a motor act,  $t(22) = -6.57$ ,  $p <$   
593  $.001$ ,  $d = -1.37$  (Figure 3).



Running head: SELF-GENERATION EFFECTS ON MEMORY

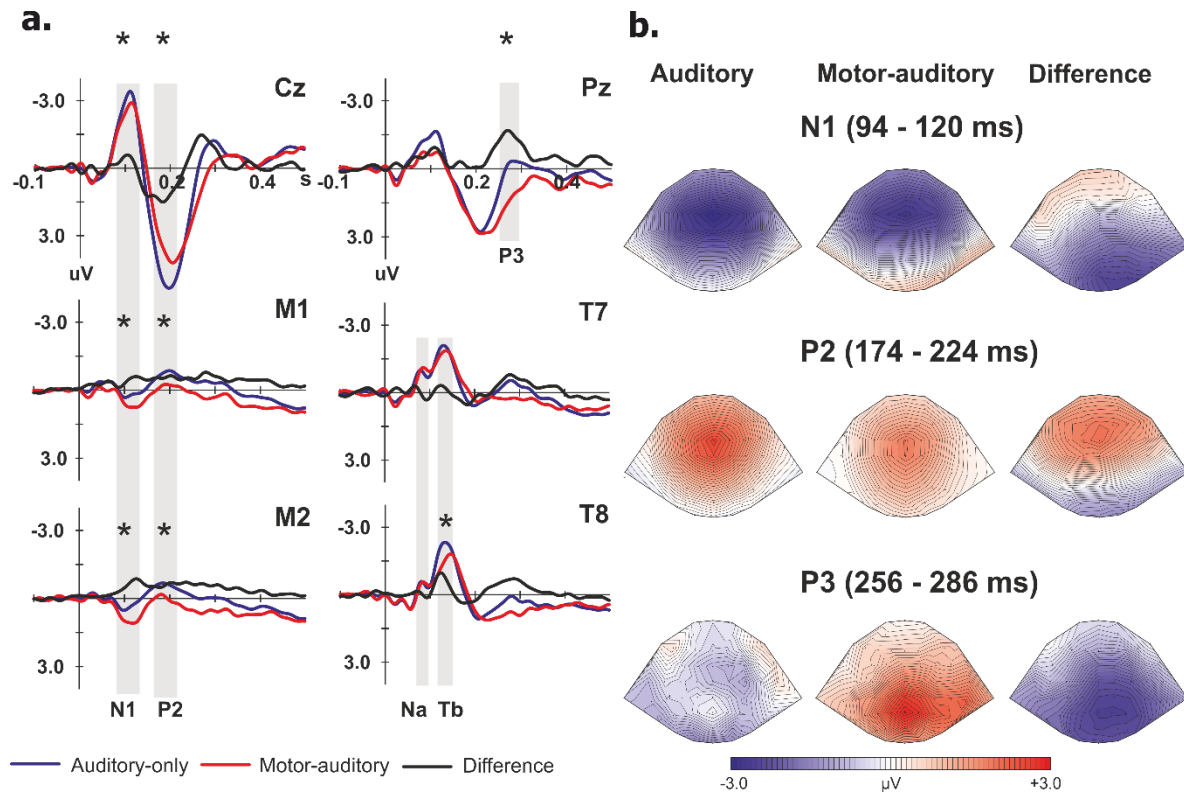

594

595 **Figure 3. a)** Group-average event-related potentials across 23 participants for the corrected  
 596 motor-auditory (red) and auditory-only (blue), analyzed in the corresponding electrodes.  
 597 Difference waves (A-[MA-M]) depicting the self-generation effects are represented in  
 598 black. Time windows used for the analyses are indicated in gray (Na: 72–92 ms, Tb: 120–  
 599 150 ms, N1: 94–120 ms, P2: 174–224 ms, P3: 256–286 ms). Significant differences in the  
 600 event-related potentials are indicated by asterisks. **b)** N1, P2, and P3 scalp topographies in  
 601 the time windows for: (1) the auditory-only condition (left); (2) the corrected motor-auditory  
 602 condition (middle); and (3) the (A-[MA-M]) difference waves, reflecting suppression (N1,  
 603 P2) and enhancement (P3) effects.

604

605

606

### 3.3. Electrophysiological responses at retrieval

607

608

609

610

611

612

613

614

Next, we subdivided the retrieval data depending on whether the sound was encoded as A or MA and whether this sound was recalled or not and we assessed whether auditory evoked responses were affected by how the sound was encoded and whether it was remembered or forgotten. To this end, we ran an ANOVA with Sound Type (Encoded as MA vs. Encoded as A) and Memory (Remembered vs. Forgotten) as within-subject factors on N1/N1<sub>mast</sub>, P2/P2<sub>mast</sub>, Na, and Tb. An electrode factor (Laterality) was included in the ANOVA for the components identified in the mastoids and temporal electrodes. Figure 4 shows all the studied peaks for the remembered (a) and the forgotten (b) sounds at retrieval in the time windows



Running head: SELF-GENERATION EFFECTS ON MEMORY

615 72–92 ms, 120–150 ms, 94–120 ms, 174–224 ms, for the Na, Tb, N1/N1<sub>mast</sub>, and P2/P2<sub>mast</sub>,  
616 respectively at the relevant electrodes for each peak.

617 We did not observe any significant effects (all  $ps > .05$ ) on the N1 at Cz and N1<sub>mast</sub>.  
618 However, significant results were obtained when we analyzed the modulatory effects of  
619 Sound Type and Memory on the N1 subcomponents at temporal sites. We obtained a  
620 significant main effect of Sound Type on Na,  $F(1, 22) = 7.39, p = .013, \eta_p^2 = .25$ , and Tb,  
621  $F(1, 22) = 7.28, p = .013, \eta_p^2 = .25$ , reflecting an enhanced amplitude for sounds that were  
622 previously encoded as MA. Additionally, we found a significant interaction between Sound  
623 Type and Memory on Na,  $F(1, 22) = 5.08, p = .035, \eta_p^2 = .19$ , where post-hoc comparisons  
624 showed significantly larger Na amplitude for sounds that were Encoded as MA and were  
625 remembered compared to sounds that were Encoded as A and were remembered,  $t(45) =$   
626  $3.73, p < .001, d = 0.55$ . In contrast, the post-hoc comparisons did not show significant  
627 differences for forgotten sounds as a function of how they were encoded,  $t(45) = 0.67, p =$   
628  $.504$ . No significant differences were found between remembered and forgotten sounds that  
629 were Encoded as A,  $t(45) = -1.34, p = .187$ , or between remembered and forgotten sounds  
630 that were Encoded as MA,  $t(45) = 1.64, p = .109$ . Similarly, we obtained a significant  
631 interaction between Sound Type and Memory on Tb,  $F(1, 22) = 4.85, p = .038, \eta_p^2 = .18$ .  
632 Post-hoc comparisons showed significantly larger Tb amplitude for sounds that were  
633 Encoded as MA and were remembered compared to sounds that were Encoded as A and were  
634 remembered,  $t(45) = 4.31, p < .001, d = 0.64$ , which is in line with the differences we obtained  
635 in the Na window. The post-hoc comparisons also showed lower Tb amplitudes for the  
636 Encoded as A sounds when they were remembered compared to when they were forgotten,  
637  $t(45) = -3.23, p = .002, d = -0.48$ . Nevertheless, no significant differences were observed  
638 between remembered and forgotten sounds that were encoded as MA,  $t(45) = 0.64, p = .523$ ,  
639 or between the Encoded as MA and Encoded as A sounds that were forgotten,  $t(45) = 0.47,$   
640  $p = .640$ . For both Na and Tb, we did not observe any significant main effects of Laterality,  
641 nor any significant interactions between Laterality and Sound Type and/or Memory (all  $ps >$   
642  $0.05$ ). Finally, we did not observe any significant effects on P2 at Cz and P2<sub>mast</sub> (all  $ps > .05$ ),  
643 except for a significant main effect of Memory on P2<sub>mast</sub>,  $F(1, 22) = 7.65, p = .011, \eta_p^2 = .26$ ,  
644 that showed lower amplitudes for sounds that were forgotten ( $M_{Forgotten} = -2.08, M_{Remembered}$   
645  $= -2.46, SD_{Forgotten} = 1.44, SD_{Remembered} = 1.56$ ).

Running head: SELF-GENERATION EFFECTS ON MEMORY

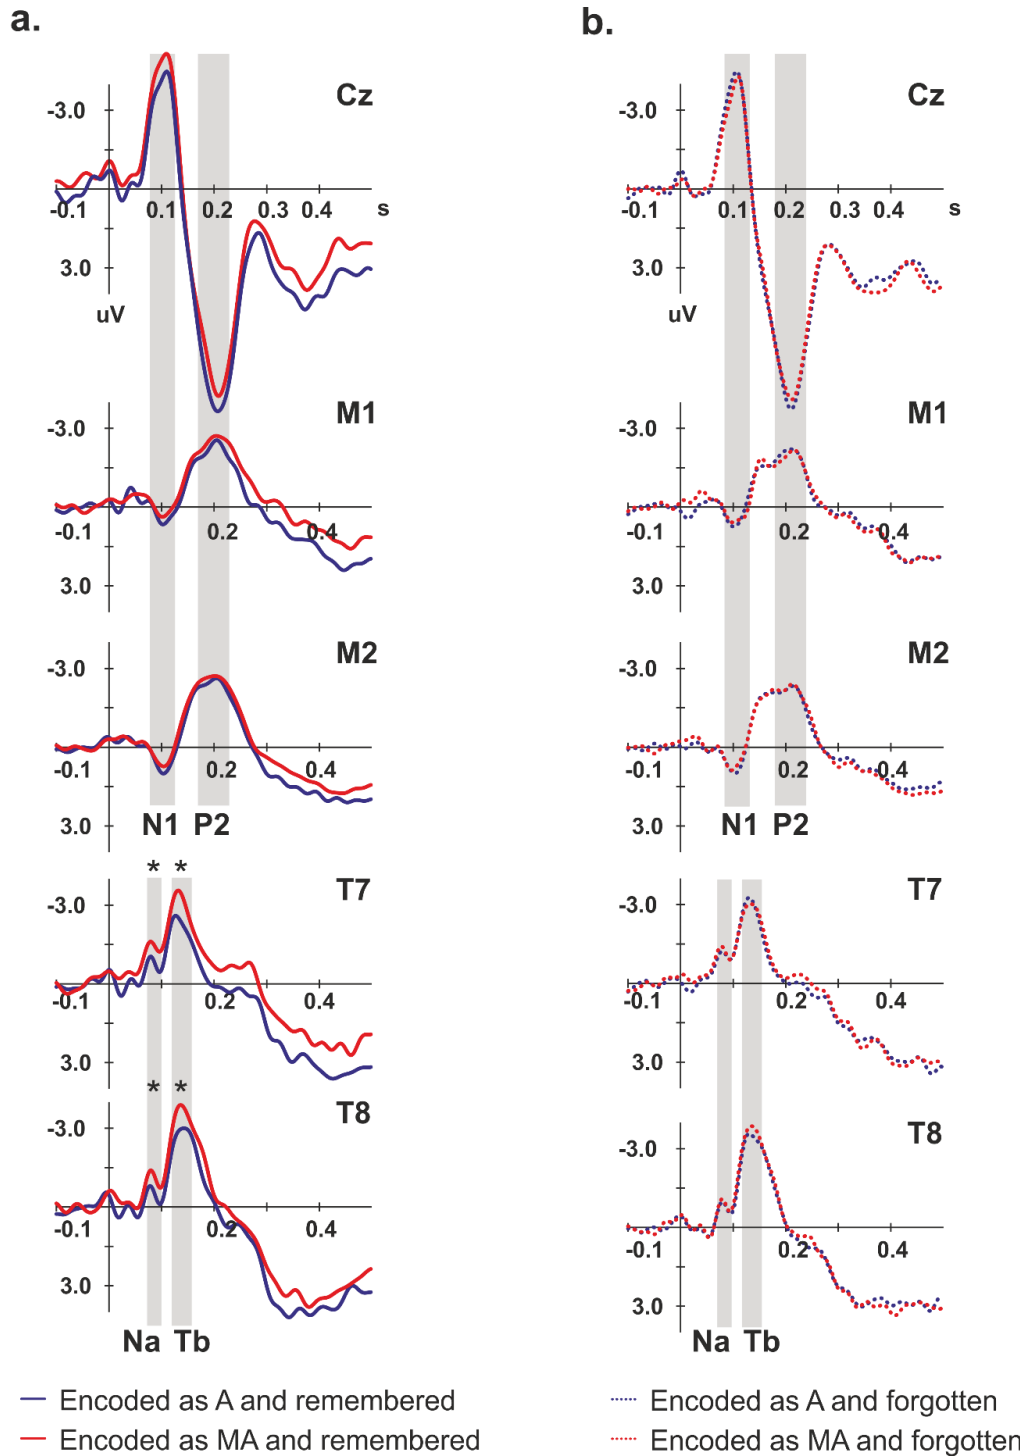

**Figure 4.** Group-average event-related potentials across 23 participants for the Encoded as MA (red) and Encoded as A (blue), analyzed in the corresponding electrodes and presented separately for the remembered (left) and the forgotten sounds (right). Time windows used for the analyses are indicated in gray (Na: 72–92 ms, Tb: 120–150 ms, N1: 94–120 ms, P2: 174–224 ms). Significant differences in the event-related potentials are indicated by asterisks.

652        **3.3. Pupil responses at encoding and retrieval**

653        Cluster-based permutation statistics were used to test for possible differences in pupil  
654 diameter between the conditions of interest. First, we tested for differences in the pupil  
655 response between motor-auditory and auditory-only events at encoding and we obtained  
656 significantly larger pupil diameter for motor-auditory events (starting 180 ms before sound  
657 onset and lasting up to 1,230 ms after sound onset;  $p < .05$ ; Figure 5a) in line with previous  
658 animal work (e.g., McGinley et al., 2015). Subsequently, we tested for possible main effects  
659 of Sound Type (Encoded as A vs. Encoded as MA) and Memory (Remembered vs.  
660 Forgotten), as well as for interactions between Sound Type and Memory on the pupil  
661 responses at retrieval. This analysis showed only a significant main effect of Memory, with  
662 larger diameter for forgotten sounds at retrieval compared to the remembered ones,  
663 irrespective of how they were encoded (starting 170 ms after sound onset and lasting until  
664 830 ms after sound onset ( $p < .05$ ; Figure 5b).

Running head: SELF-GENERATION EFFECTS ON MEMORY

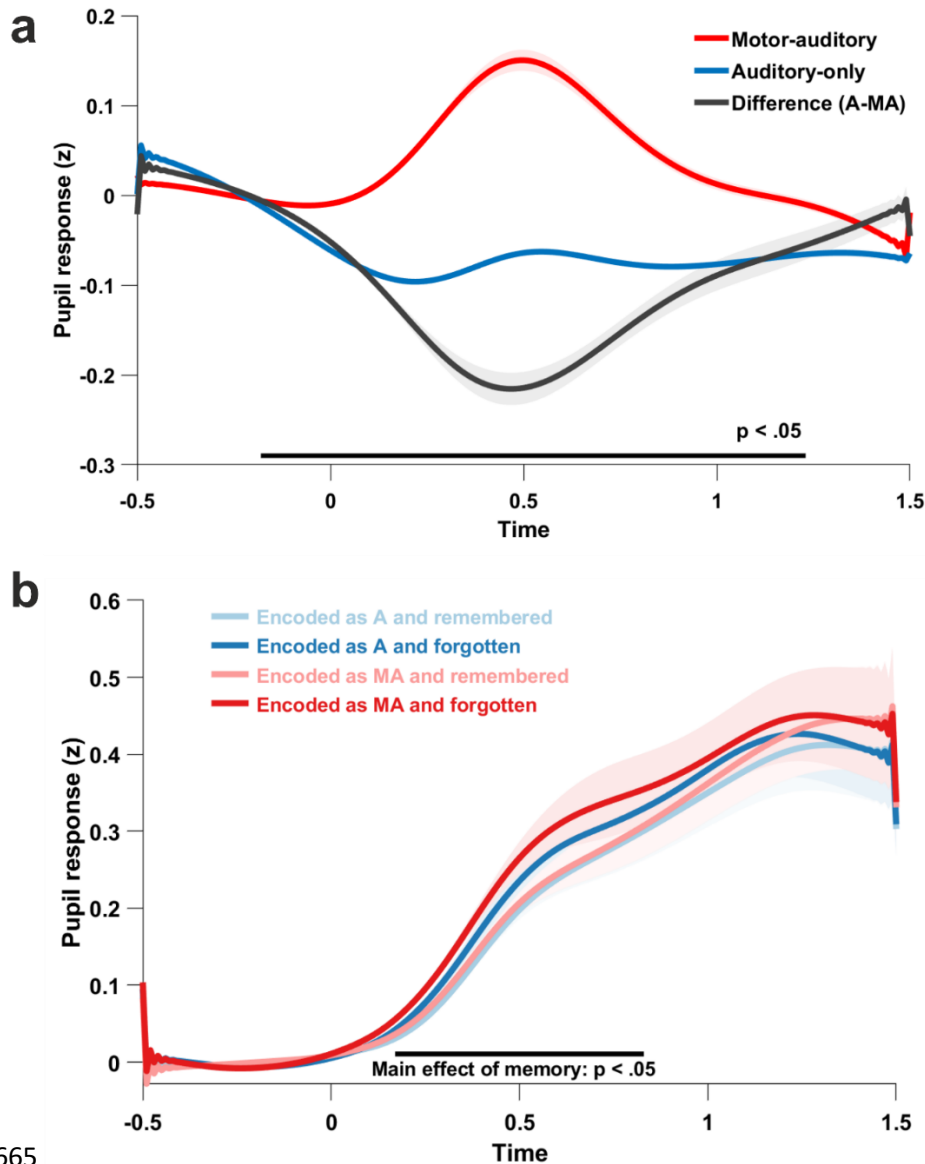

665

666 **Figure 5. a)** The group-average evoked pupil responses to auditory-only (blue) and motor-  
667 auditory (red) events. The effect is depicted as the difference between auditory-only and  
668 motor-auditory events (black). Black bar indicates a significant Auditory-only vs. Motor-  
669 auditory effect in the window 180 pre-stimulus to 1,230 ms post-stimulus,  $p < .05$  (cluster-  
670 based permutation test). **b)** The group-average evoked pupil responses to encoded as auditory  
671 (A) and encoded as motor-auditory (MA), separately for the remembered and forgotten  
672 sounds. Black bar indicates a significant main effect of memory for Remembered vs.  
673 Forgotten sounds in the window 170 – 830 ms post-stimulus,  $p < .05$  (cluster-based  
674 permutation test).

675 **3.4. Correlations**

676 Next, we tested for possible correlations between the behavioural performance,  
 677 pupillometric and electrophysiological data. For the correlation analyses, we focused on the  
 678 significant neurophysiological effects at encoding (i.e., ERPs and pupil diameter) and the  
 679 significant behavioural effect on memory performance. The effects were introduced in the  
 680 correlation analyses as the difference between A and MA events (see Methods). For the  
 681 components identified in two electrodes, we calculated the mean amplitude across the two,  
 682 except for the Tb at encoding, where we introduced only the amplitudes at T8 given the  
 683 significant interaction between Sound Type and Laterality that showed that attenuation was  
 684 lateralized. For the pupil data, we calculated the peak of the difference wave (A – MA) within  
 685 the window of significance (180 ms pre-stimulus until 1,230 ms post-stimulus). All the  
 686 planned correlations are reported in Table 2.

687

688 **Table 2.** Correlations between the significant self-generation effects. a) electrophysiological  
 689 effects at encoding (N1, P2, N1<sub>mast</sub>, P2<sub>mast</sub>, P3, and Tb amplitudes) and memory performance  
 690 (1T sequences), b) neuromodulatory effects at encoding (pupil diameter) and memory  
 691 performance (1T sequences), c) electrophysiological (N1, P2, N1<sub>mast</sub>, P2<sub>mast</sub>, P3, and Tb  
 692 amplitudes) and neuromodulatory (pupil diameter) effects at encoding.

693

| <i>Correlations between</i>              |                    | <i>r</i> | <i>p</i>       |
|------------------------------------------|--------------------|----------|----------------|
| (a) Memory performance<br>(1T sequences) | N1                 | -0.43    | <b>0.041 *</b> |
|                                          | Tb (at T8 only)    | -0.55    | <b>0.007**</b> |
|                                          | P2                 | -0.19    | 0.383          |
|                                          | N1 <sub>mast</sub> | -0.41    | 0.055          |
|                                          | P2 <sub>mast</sub> | -0.10    | 0.657          |
|                                          | P3                 | -0.35    | 0.098          |
| (b) Memory performance<br>(1T sequences) | Pupil diameter     | 0.46     | <b>0.029*</b>  |
| (c) Pupil diameter                       | N1                 | -0.36    | 0.091          |
|                                          | Tb (at T8 only)    | -0.25    | 0.251          |
|                                          | P2                 | 0.27     | 0.209          |
|                                          | N1 <sub>mast</sub> | -0.23    | 0.291          |
|                                          | P2 <sub>mast</sub> | -0.16    | 0.507          |
|                                          | P3                 | -0.08    | 0.702          |

694

Running head: SELF-GENERATION EFFECTS ON MEMORY

695 First, we tested whether the significant self-generation effects at encoding (on N1, P2,  
696 N1<sub>mast</sub>, P2<sub>mast</sub>, P3, and Tb amplitudes) correlated with the significant self-generation effects  
697 on memory performance (1T sequences). This analysis showed a negative correlation  
698 between N1 suppression and memory performance ( $r = -0.43$ ,  $p = .041$ ; Figure 6a), and a  
699 negative correlation between Tb suppression (at T8) and memory performance ( $r = -0.55$ ,  $p$   
700  $= .007$ ; Figure 6b), that is, the larger the N1 and Tb suppression, the greater the memory  
701 impairment for motor-auditory compared to auditory-only sounds. The remaining  
702 correlations did not reach significance (all  $ps > .05$ ). Second, we assessed whether the  
703 difference in pupil diameter between auditory-only and motor-auditory events was related to  
704 memory performance and we obtained a significant positive correlation between the two ( $r$   
705  $= 0.46$ ,  $p = 0.029$ ; Figure 6c), that is, the larger the pupil dilation for the motor-auditory  
706 events, the greater the memory impairment for these sounds. Third, we tested for possible  
707 links between the self-generation effects obtained in the ERP analyses (i.e., N1, P2, N1<sub>mast</sub>,  
708 P2<sub>mast</sub>, P3 and Tb) and the larger pupil diameter for motor-auditory events. None of these  
709 correlations reached significance (all  $ps > .05$ ), but we observed a non-significant trend  
710 towards a correlation between N1 attenuation at Cz and pupil dilation for MA events (Figure  
711 6d).

712 Finally, we performed an exploratory correlation analysis to test whether the significant  
713 differences in sensory processing we obtained at retrieval between Encoded as A and  
714 Encoded as MA sounds were related to the magnitude of the self-generation effects at  
715 encoding. To this end, we performed a correlation analysis between the A – MA difference  
716 in peaks of the Na and Tb amplitudes (only for the remembered sounds due to the significant  
717 interaction) and the effects at encoding (for the N1, P2, N1<sub>mast</sub>, P2<sub>mast</sub>, P3, and Tb amplitudes).  
718 We obtained a significant positive correlation between the P2 suppression at encoding and  
719 the Na enhancement at retrieval for the remembered sounds, reflecting that the larger the  
720 attenuation for P2 at encoding, the larger the Na enhancement for the Encoded as MA sounds  
721 that were remembered at retrieval ( $r = 0.51$ ,  $p = .012$ ). Similarly, we also obtained a  
722 significant negative correlation between Tb at encoding (at T8) and Na for the remembered  
723 sounds at retrieval ( $r = -0.42$ ,  $p = .04$ ), showing that the larger the attenuation for Tb at  
724 encoding, the greater the Na enhancement for motor-auditory sounds that were remembered  
725 at retrieval.

Running head: SELF-GENERATION EFFECTS ON MEMORY

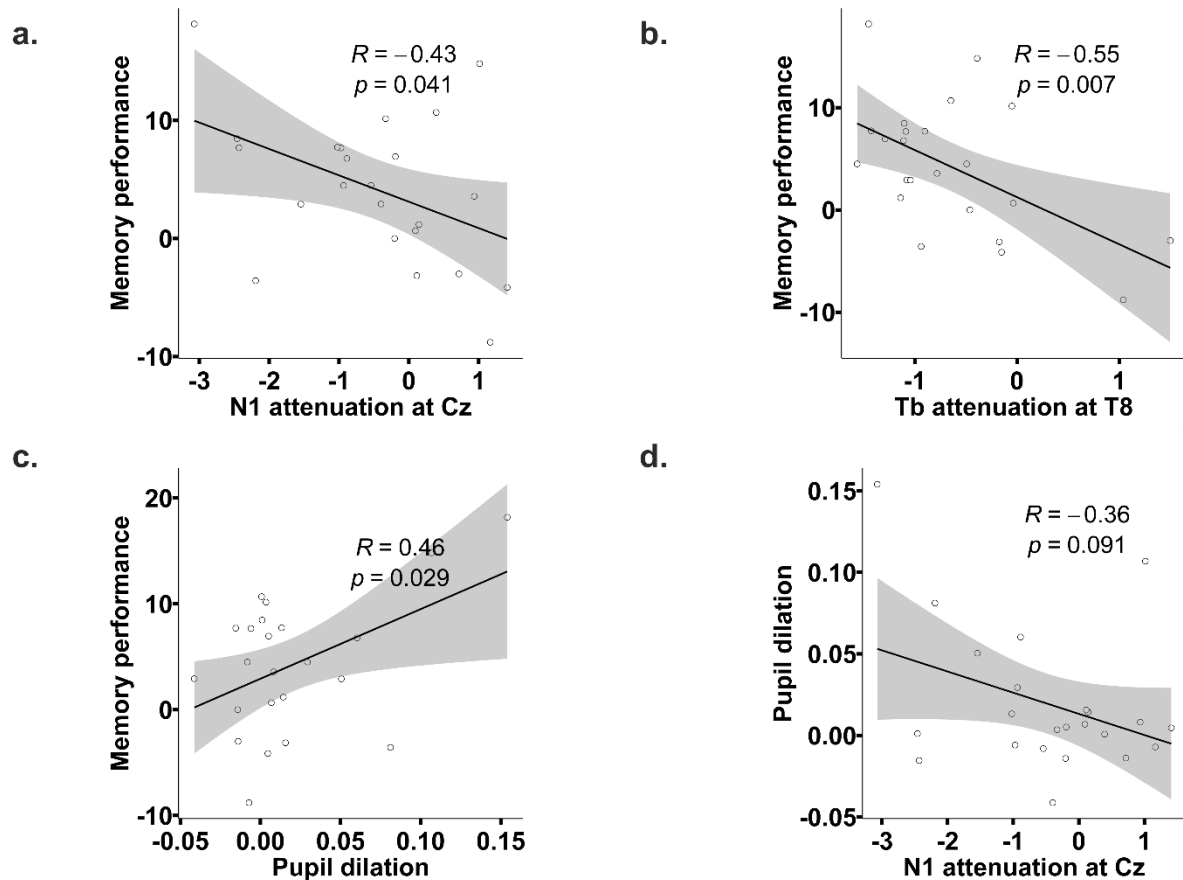

726

727 **Figure 6.** Planned correlations between the behavioural, electrophysiological, and pupil data  
728 using the Pearson correlation coefficient. **a-b)** Significant negative correlations between N1  
729 suppression (at Cz) and memory performance ( $r = -0.43$ ,  $p = .041$ ), and Tb suppression (at  
730 T8) and memory performance ( $r = -0.55$ ,  $p = .007$ ), showing that the larger the N1 and Tb  
731 suppression, the greater the memory impairment for motor-auditory compared to the  
732 auditory-only sounds. More negative values indicate larger suppression effects for N1 and  
733 Tb and worse memory performance for motor-auditory sounds. **c)** Significant positive  
734 correlation between pupil dilation and memory performance ( $r = 0.46$ ,  $p = 0.029$ ), that is, the  
735 larger the pupil dilation for the motor-auditory events, the greater the memory impairment  
736 for these sounds. **d)** The correlation between N1 attenuation at Cz and pupil dilation at  
737 encoding for the MA events did not reach significance ( $r = -0.36$ ,  $p = 0.091$ ). The shaded  
738 gray areas represent the confidence interval (95% confidence level).



739 **4. Discussion**

740 In this study, we assessed the effects of motor actions on sensory processing and memory  
741 encoding of concomitant, but unpredictable sounds, by employing a combination of a self-  
742 generation and memory recognition task, while monitoring the brain's and the pupil's  
743 responses to sounds that were either presented passively or that coincided in time with a  
744 motor act. The aim of the present work was to assess how motor acts affect first sensory  
745 processing and second memory encoding of concomitant sounds, and the possible  
746 relationships between these two types of effects of actions. Related to the first aim, regarding  
747 the effects of actions on sensory processing, we examined whether a) attenuation of sensory  
748 processing (i.e., measured by ERPs) prevails even in the absence of a contingent action-sound  
749 relationship (e.g., Hórvath et al., 2012), b) actions create a halo of subcortical  
750 neuromodulation around them that could be reflected in the pupil diameter (e.g., McGinley  
751 et al., 2015), and c) sensory processing (i.e., measured by ERPs) and subcortical  
752 neuromodulation (i.e., measured by pupil diameter) were related. Our findings showed N1,  
753 P2, P2<sub>mast</sub>, and Tb attenuation for motor-auditory sounds even when they merely coincide  
754 with the action, as well as enhancement of P3 and N1<sub>mast</sub>. These findings suggest that self-  
755 generation effects are at least partly stimulus-unspecific and driven by alternative  
756 mechanisms to the cancellation of predicted sensory reafference via motor forward  
757 modelling. Additionally, our data replicated previous animal work (e.g., McGinley et al.,  
758 2015) showing that pupil diameter increases dramatically for motor-auditory compared to  
759 auditory-only events providing evidence for an alternative stimulus-unspecific mechanism  
760 that could underlie sensory suppression for self-generated sounds, namely the activation of  
761 subcortical neuromodulation during motor actions. However, the data did not provide clear  
762 evidence for a correlation between sensory attenuation and pupil dilation for motor-auditory  
763 events. The second aim of the present study was to investigate how actions affect memory  
764 encoding of concomitant sounds and whether the potential differences in the memory  
765 encoding of motor-auditory and passively presented sounds correlate with sensory  
766 suppression and/or subcortical neuromodulation. We found a significant impairment in  
767 memory performance for sounds that were encoded as motor-auditory compared to the  
768 auditory-only ones demonstrating that the mere presence of an action affects memory  
769 encoding of simultaneously presented stimuli. Most importantly, worsened memory

Running head: SELF-GENERATION EFFECTS ON MEMORY

770 performance for motor-auditory events correlated with increased sensory suppression (i.e.,  
771 N1 and Tb attenuation) and larger pupil dilation for motor-auditory events. These findings  
772 fit well with the predictive coding framework suggesting that prediction errors (i.e., reflected  
773 in ERPs) drive learning and memory and further support previous work showing that high  
774 arousal (i.e., reflected in pupil diameter) may worsen behavioural performance.

775 The first aim of the present study was to assess the effects of actions on auditory  
776 processing and subcortical neuromodulation, as well as the relationship between the two.  
777 First, we replicate previous work showing that attenuation of N1 and Tb prevails even for  
778 mere action-sound coincidences (Horváth et al., 2012, 2013b). Traditionally the N1  
779 attenuation has been attributed to predictive processing driven by our actions that attenuate  
780 responses in auditory areas when the stimulus can be indeed predicted by the action, implying  
781 that attenuation should be specific to the predicted stimulus and thus, mediated by sensory-  
782 specific cortices. The stimulus-specificity of the self-generation effects is supported by work  
783 showing more pronounced suppression when predictions match more precisely with the  
784 sensory input (Fu et al., 2006; Hashimoto & Sakai, 2003; Heinks-Maldonado, Mathalon,  
785 Gray, & Ford, 2005; Houde, Nagarajan, Sekihara, & Merzenich, 2002; Baess et al., 2008).  
786 However, attenuation of auditory responses occurs also for stimuli merely coinciding with  
787 finger movements (Hazemann, Audin, & Lille, 1975; Horváth et al., 2012; Makeig, Muller,  
788 & Rockstroh, 1996; Tapia, Cohen, & Starr, 1987) or for unrelated auditory inputs during  
789 speech (Numminen, Salmelin, & Hari, 1999), reminiscent of the generalized attenuation  
790 found in other sensory modalities during movements (e.g., saccadic suppression or  
791 somatosensory gating; Crapse & Sommer, 2008; Williams, Shenasa, & Chapman, 1998;  
792 Ross, Morrone, Goldberg, & Burr, 2001). The stimulus-unspecificity of the effects is at least  
793 partly supported by evidence suggesting that the N1 and Tb attenuation is probably driven  
794 by mere temporal contiguity (Horváth et al., 2012; Hazemann et al., 1975; Han et al., 2021)  
795 or temporal predictability (Schafer & Marcus, 1973; Lubinus et al., 2020; Kaiser & Schütz-  
796 Bosbach, 2018) and that it mostly reflects modulations of the unspecific component of the  
797 auditory N1 (SanMiguel et al., 2013). In line with this evidence, our findings partly point to  
798 the modulation of the unspecific component, since for the suppression to be specific to the  
799 auditory cortex, N1 should be suppressed at vertex but also at the mastoids. Instead, here we  
800 found N1 suppression at vertex, but enhancement on the mastoids for sounds coinciding with

Running head: SELF-GENERATION EFFECTS ON MEMORY

801 actions. Therefore, the effects cannot be entirely specific and action-related activity  
802 enhancements – possibly of attentional origin – in auditory areas may take place  
803 concomitantly (Horváth, 2015; Schröger et al., 2015; Flinker et al., 2010).

804 The effects on N1 were followed by attenuated P2 and enhanced P3 responses for the  
805 sounds coinciding with actions. Although a functional interpretation of P2 is missing  
806 (Crowley & Colrain, 2004), empirical evidence has shown that P2 attenuation is mediated by  
807 secondary auditory areas (Bosnyak et al., 2004; Pantev et al., 1996), reflecting the processing  
808 of the specific features of auditory stimuli (Shahin et al., 2005), and it correlates with the  
809 sense of agency (i.e., the feeling of control over actions and their consequences; Gallagher,  
810 2000) contrary to the N1 that does not (Ford et al., 2013; Kühn et al., 2011; Timm et al.,  
811 2016). These characteristics along with our data showing P2 attenuation in both vertex and  
812 mastoids may point to a functional dissociation between N1 and P2 as suggested by previous  
813 work (Knolle, Schröger, & Kotz, 2013; Schröger et al., 2015; Chen et al., 2012). Following  
814 the P2 attenuation, we found enhanced P3 amplitude at Pz for sounds coinciding with actions.  
815 Interestingly, a P3 effect was also evident – although not discussed – in previous work with  
816 action-sound coincidences (Horváth et al., 2012). Recently, this effect has been suggested to  
817 reflect violations in action-related predictions (Darriba et al., 2021) which may occur in tasks  
818 where the self-generated sound is unexpected (e.g., in coincidence tasks where the action  
819 does not always result in a sound; Horváth et al., 2012). Although previous work has already  
820 described P3 modulations in self-generation paradigms, the posterior distribution and later  
821 peak of our effect differentiates it from the fronto-central P3a effect reported for unexpected  
822 externally-generated sounds (Baess et al., 2011) or self-generated deviant sounds (Knolle et  
823 al., 2013b). Based on previous theories, we speculate that the posterior P3 effect may be  
824 related to context updating (Donchin & Coles, 1988), event categorization (Kok, 2001) or  
825 decision making (Twomey et al., 2015) and may reflect an evaluative process of the stimulus  
826 (i.e., self/external categorization) that ultimately updates the internal model about the sensory  
827 consequences of the button press (Polich, 2007).

828 The present study demonstrates that neuromodulatory processes take place concomitantly  
829 to the modulatory effects of action-sound coincidence on evoked electrophysiological  
830 responses. We obtained pupil dilation measures that are known to track the activity of the  
831 LC-NE system (Aston-Jones & Cohen, 2005, Murphy, O’Connell et al., 2014; Joshi et al.,

Running head: SELF-GENERATION EFFECTS ON MEMORY

832 2016) and we showed a remarkable increase in pupil diameter for the motor-auditory events  
833 that started even before the action (cf. McGinley et al., 2015a), supporting previous work  
834 reporting pupil dilation during finger movements (Lubinus et al., 2021; Yebra et al., 2019),  
835 and locomotion (Reimer et al., 2014; Vinck et al., 2015; McGinley et al., 2015) even in the  
836 absence of visual stimulation (Richer & Beatty, 1985; Hupe et al., 2009). We hypothesized  
837 that these neuromodulatory processes might be behind the stimulus-unspecific effects of  
838 actions on simultaneously presented stimuli. However, pupil dilation did not correlate with  
839 the sensory suppression effects for self-generated sounds. Although this may suggest that  
840 motor-induced sensory suppression and arousal-related neuromodulation during actions  
841 operate independently, there was a non-significant trend towards a link between N1  
842 attenuation at the vertex and pupil dilation, and both of these measures correlated  
843 significantly with memory performance. These inconclusive findings raise the need of future  
844 work to further test for relationships between action-induced suppression effects and  
845 neuromodulatory mechanisms operating during movement. In fact, previous work has shown  
846 that movement correlates with some effects attributed to arousal (Reimer et al., 2014; Vinck  
847 et al., 2015), yet, motor signals and arousal-related neuromodulatory inputs have been  
848 suggested to exert distinct influences on sensory processing (e.g., McGinley et al., 2015a;  
849 Nelson & Mooney, 2016; Reimer et al., 2014; Vinck et al., 2015; for a review see Ferguson  
850 & Cardin, 2020). Although we cannot exclude the contribution of other mechanisms, our  
851 findings suggest that sensory suppression is not driven by noradrenergic-mediated  
852 modulations that have been mainly observed in the sensory thalamus rather than the sensory-  
853 specific areas (McBurney et al., 2019), supporting the idea of noradrenergic release from the  
854 LC-NE as a “hub” switch for triggering temporally specific, but spatially widespread changes  
855 throughout the entire cortex (Kim et al., 2016; Aston-Jones & Cohen, 2005).

856 The second aim of the present study was to assess how the differential processing for  
857 sounds coinciding with actions might affect their encoding in memory. While the links  
858 between sensorimotor processing of auditory stimuli and memory processes remain largely  
859 unexplored, there is evidence that actions attenuate responses in areas supporting memory  
860 processes (i.e., Rummell et al., 2016; Mukamel et al., 2010), raising the possibility of a link  
861 between self-generation and memory. In our study, motor actions affected the memory  
862 encoding of concurrent sounds, but the effects were reflected only in memory performance

Running head: SELF-GENERATION EFFECTS ON MEMORY

863 and not in memory bias. The null effects on memory bias might suggest that participants  
864 could recognize that both test sounds at retrieval were presented before, which is supported  
865 by the general high level of objective accuracy as well as by reports during an informal  
866 debriefing suggesting that many participants thought that most times all sounds at retrieval  
867 were presented before. The memory benefit for the more surprising externally-generated  
868 sounds fits well with predictive coding theories postulating that items eliciting larger  
869 prediction errors at encoding will be encoded better in memory (Henson & Gagnepain, 2010;  
870 Greve et al., 2017, 2019; Heilbron & Chait, 2018; Henson & Gagnepain, 2010; Pine et al.,  
871 2018; Krawczyk et al., 2018; Rescorla & Wagner, 1972; Exton-McGuinness et al., 2015).  
872 Yet, one would expect to observe this effect only in contingent paradigms where self-  
873 generated sounds are inherently more predictable than the externally-generated ones.  
874 However, although in our study actions were not predictive of sound identity or occurrence,  
875 they afforded better temporal predictability, which may have compromised the memory  
876 encoding of motor-auditory sounds. In fact, the present work is the first human study – to our  
877 knowledge – to show that the self-generation effects (i.e., N1 and Tb attenuation) are related  
878 to the performance decrements for sounds produced by actions as suggested by previous  
879 animal work (Schneider et al., 2018; McGinley et al., 2015; Schneider et al., 2020). These  
880 findings support the idea that the larger prediction error responses to unexpected items (as  
881 indexed by enhanced ERPs to A compared to MA events at encoding) initiate a cascade of  
882 synaptic changes, allowing for more distinctive representations at encoding (Kirwan & Stark,  
883 2007, Norman, 2010) and thus better recollection at retrieval. Consistent with this  
884 framework, the hippocampus has been implicated as a novelty and match/mismatch detector  
885 (Knight, 1996, Stern et al., 1996, Li et al., 2003; Duncan et al., 2012) and there is compelling  
886 evidence for hippocampal involvement in learning from prediction errors (Schiffer et al.,  
887 2012) and expecting upcoming events (Davachi & DuBrow, 2015, Hindy et al.,  
888 2016, Schapiro et al., 2017). Collectively, our data supports the predictive account of  
889 memory by showing that sensory attenuation, interpreted as reduced prediction error, is  
890 related to decreased memory performance.

891 Memory performance correlated with pupil diameter as well, such that the larger the pupil  
892 diameter for motor-auditory events the worse the memory performance for these sounds at  
893 retrieval. To date, there have been no direct attempts to test for possible links between motor-

Running head: SELF-GENERATION EFFECTS ON MEMORY

894 induced pupil dilation and memory performance for stimuli triggered by actions. Some  
895 interim evidence points to a negative relationship between pupil dilation and detection  
896 performance during (McGinley et al., 2015), but also without (Murphy, Vandekerckhove, &  
897 Nieuwenhuis, 2014) locomotion, suggesting that performance may follow the classically  
898 described, inverted U-shaped dependence on arousal (Yerkes & Dodson, 1908): Intermediate  
899 levels of arousal – as indexed by pupil diameter – occur in states of quiet wakefulness and  
900 are characterized by optimal performance. In contrast, performance during high-arousal  
901 states such as movement, or during quiescence, drops dramatically. Therefore, the observed  
902 link between pupil dilation and memory performance in our study may provide yet another  
903 piece of evidence supporting the detrimental effects of high arousal on behavioural  
904 performance.

905 The present study had clear hypotheses about the effects of actions on sensory and pupil  
906 responses at encoding, yet, exploratory analyses of the retrieval data revealed further effects.  
907 First, we obtained higher Na and Tb amplitudes for the sounds encoded as motor-auditory  
908 and remembered compared to the remembered and encoded as auditory-only ones. Since the  
909 sounds encoded as motor-auditory were presented passively at retrieval (i.e., without the  
910 motor representation that they were encoded with), the higher Na and Tb amplitudes may  
911 reflect a form of contextual prediction error (Exton-McGuinness et al. 2015; Kim et al., 2014;  
912 Sinclair & Barense, 2019) due to the mismatch between encoding and retrieval contexts for  
913 these sounds. This interpretation can be partly supported by the exploratory correlation  
914 analyses that showed that the larger the P2 and Tb attenuation for motor-auditory sounds at  
915 encoding, the greater the Na enhancement for these sounds at retrieval when they were  
916 remembered. Thus, the greater the effect of the action at encoding, the greater the contextual  
917 prediction error when the sound is presented without the action at retrieval. Second, we found  
918 larger pupil responses for the forgotten compared to the remembered sounds at retrieval  
919 irrespective of how they were encoded. While previous work has reported an old/new pupil  
920 effect (i.e., increased pupil responses for the remembered items; Kafkas & Montaldi, 2015;  
921 Naber et al., 2013, but see Beukema et al., 2019 for the opposite effect), in our study both  
922 sounds at retrieval were presented before. The increase in pupil diameter for the forgotten  
923 sounds at retrieval could be instead related to selection or decision uncertainty (Geng et al.,



Running head: SELF-GENERATION EFFECTS ON MEMORY

924 2015; Richer & Beatty, 1987; Nassar et al., 2012; Preuschoff et al., 2011) when participants  
925 experienced greater difficulty to decide whether a given sound was presented before or not.

926 In sum, the overarching aim of the present study was to investigate how motor acts affect  
927 both sensory processing and the memory encoding of concomitant sounds. To the best of our  
928 knowledge, there have been no previous attempts to simultaneously assess the specificity of  
929 the self-generation effects and their possible link with neuromodulatory processes while also  
930 looking into their possible effects on memory encoding. Here, in a combination of self-  
931 generation and memory task, we show that actions affect auditory responses, pupil diameter,  
932 and memory encoding of sounds. Actions suppressed sensory responses for concomitant  
933 sounds and increased pupil diameter, but these effects were not related, pointing to  
934 simultaneous, but probably independent processes. However, sensory suppression and pupil  
935 dilation both correlated with memory performance independently, such that the memory  
936 performance for sounds coinciding with actions decreased with larger sensory attenuation  
937 and greater pupil dilation. Collectively, our findings show self-generation effects even in the  
938 absence of a predictive action-sound relationship, replicate previous work showing that pupil  
939 diameter increases during actions, and finally point to differentiated internal memory  
940 representations for stimuli triggered by ourselves compared to externally presented ones.  
941 More importantly, the present study shows that subcortical neuromodulatory systems, along  
942 with cortical processes, simultaneously orchestrate auditory processing and memory  
943 encoding.



Running head: SELF-GENERATION EFFECTS ON MEMORY

944 **CRedit authorship contribution statement**

945 **Nadia Paraskevoudi:** Conceptualization, Formal Analysis, Methodology, Software,  
946 Investigation, Writing - Original draft preparation, Visualization. **Iria SanMiguel:**  
947 Conceptualization, Formal Analysis, Methodology, Software, Writing - Original draft  
948 preparation, Supervision, Project administration, Funding acquisition.

949

950 **Acknowledgements**

951 This work is part of the project PSI2017-85600-P, funded by MCIN/AEI/  
952 10.13039/501100011033 and by “ERDF A way of making Europe”; it has been additionally  
953 supported by the MDM-2017-0729-18-2M Maria de Maeztu Center of Excellence UBNeuro,  
954 funded by MCIN/AEI/ 10.13039/501100011033, and by the Excellence Research Group  
955 2017SGR-974 funded by the Secretaria d'Universitats i Recerca del Departament d'Empresa  
956 i Coneixement de la Generalitat de Catalunya. ISM was supported by grant RYC-2013-  
957 12577, funded by MCIN/AEI/ 10.13039/501100011033 and by “ESF Investing in your  
958 future”. NP was supported by predoctoral fellowship FI-DGR 2019 funded by the Secretaria  
959 d'Universitats i Recerca de la Generalitat de Catalunya and the European Social Fund.

960

961

962       **References**

- 963       Aston-Jones, G., & Cohen, J. D. (2005). An integrative theory of locus coeruleus-
- 964                norepinephrine function: Adaptive Gain and Optimal Performance. *Annual Review*
- 965                *of Neuroscience*, 28(1), 403–450.
- 966                <https://doi.org/10.1146/annurev.neuro.28.061604.135709>
- 967       Baess, P., Horváth, J., Jacobsen, T., & Schröger, E. (2011). Selective suppression of self-
- 968                initiated sounds in an auditory stream: An ERP study: Selective suppression of self-
- 969                initiated sounds. *Psychophysiology*, 48(9), 1276–1283.
- 970                <https://doi.org/10.1111/j.1469-8986.2011.01196.x>
- 971       Bar, M. (2009). The proactive brain: Memory for predictions. *Philosophical Transactions*
- 972                *of the Royal Society B: Biological Sciences*, 364(1521), 1235–1243.
- 973                <https://doi.org/10.1098/rstb.2008.0310>
- 974       Bäb, P., Jacobsen, T., & Schröger, E. (2008). Suppression of the auditory N1 event-related
- 975                potential component with unpredictable self-initiated tones: Evidence for internal
- 976                forward models with dynamic stimulation. *International Journal of*
- 977                *Psychophysiology*, 70(2), 137–143. <https://doi.org/10.1016/j.ijpsycho.2008.06.005>
- 978       Beukema, S., Jennings, B. J., Olson, J. A., & Kingdom, F. A. A. (2019). The Pupillary
- 979                Response to the Unknown: Novelty Versus Familiarity. *I-Perception*, 10(5),
- 980                204166951987481. <https://doi.org/10.1177/2041669519874817>
- 981       Binda, P., Pereverzeva, M., & Murray, S. O. (2013). Attention to Bright Surfaces Enhances
- 982                the Pupillary Light Reflex. *Journal of Neuroscience*, 33(5), 2199–2204.
- 983                <https://doi.org/10.1523/JNEUROSCI.3440-12.2013>
- 984       Blakemore, S.-J., Wolpert, D. M., & Frith, C. D. (1998). Central cancellation of self-
- 985                produced tickle sensation. *Nature Neuroscience*, 1(7), 635–640.
- 986                <https://doi.org/10.1038/2870>
- 987       Bosnyak, D. J. (2004). Distributed Auditory Cortical Representations Are Modified When
- 988                Non-musicians Are Trained at Pitch Discrimination with 40 Hz Amplitude
- 989                Modulated Tones. *Cerebral Cortex*, 14(10), 1088–1099.
- 990                <https://doi.org/10.1093/cercor/bhh068>
- 991       Brown, R. M., & Palmer, C. (2012). Auditory–motor learning influences auditory memory
- 992                for music. *Memory & Cognition*, 40(4), 567–578. <https://doi.org/10.3758/s13421->

Running head: SELF-GENERATION EFFECTS ON MEMORY

- 993           011-0177-x
- 994   Chagnaud, B. P., Banchi, R., Simmers, J., & Straka, H. (2015). Spinal corollary discharge  
995           modulates motion sensing during vertebrate locomotion. *Nature Communications*,  
996           6(1), 7982. <https://doi.org/10.1038/ncomms8982>
- 997   Chatrian, G. E., Lettich, E., & Nelson, P. L. (1985). Ten Percent Electrode System for  
998           Topographic Studies of Spontaneous and Evoked EEG Activities. *American*  
999           *Journal of EEG Technology*, 25(2), 83–92.  
1000           <https://doi.org/10.1080/00029238.1985.11080163>
- 1001   Chen, Z., Chen, X., Liu, P., Huang, D., & Liu, H. (2012). Effect of temporal predictability  
1002           on the neural processing of self-triggered auditory stimulation during vocalization.  
1003           *BMC Neuroscience*, 13(1), 55. <https://doi.org/10.1186/1471-2202-13-55>
- 1004   Conway, M. A., & Gathercole, S. E. (1987). Modality and long-term memory. *Journal of*  
1005           *Memory and Language*, 26(3), 341–361. [https://doi.org/10.1016/0749-](https://doi.org/10.1016/0749-596X(87)90118-5)  
1006           596X(87)90118-5
- 1007   Crapse, T. B., & Sommer, M. A. (2008). Corollary discharge across the animal kingdom.  
1008           *Nature Reviews Neuroscience*, 9(8), 587–600. <https://doi.org/10.1038/nrn2457>
- 1009   Crowley, K. E., & Colrain, I. M. (2004). A review of the evidence for P2 being an  
1010           independent component process: Age, sleep and modality. *Clinical*  
1011           *Neurophysiology*, 115(4), 732–744. <https://doi.org/10.1016/j.clinph.2003.11.021>
- 1012   Darriba, Á., Hsu, Y.-F., Van Ommen, S., & Waszak, F. (2021). Intention-based and  
1013           sensory-based predictions. *Scientific Reports*, 11(1), 19899.  
1014           <https://doi.org/10.1038/s41598-021-99445-z>
- 1015   Davachi, L., & DuBrow, S. (2015). How the hippocampus preserves order: The role of  
1016           prediction and context. *Trends in Cognitive Sciences*, 19(2), 92–99.  
1017           <https://doi.org/10.1016/j.tics.2014.12.004>
- 1018   Delorme, A., & Makeig, S. (2004). EEGLAB: An open source toolbox for analysis of  
1019           single-trial EEG dynamics including independent component analysis. *Journal of*  
1020           *Neuroscience Methods*, 134(1), 9–21.  
1021           <https://doi.org/10.1016/j.jneumeth.2003.10.009>
- 1022   Donchin, E., & Coles, M. G. H. (1988). Is the P300 component a manifestation of context  
1023           updating? *Behavioral and Brain Sciences*, 11(03), 357.

Running head: SELF-GENERATION EFFECTS ON MEMORY

- 1024 <https://doi.org/10.1017/S0140525X00058027>
- 1025 Duncan, K., Ketz, N., Inati, S. J., & Davachi, L. (2012). Evidence for area CA1 as a  
1026 match/mismatch detector: A high-resolution fMRI study of the human  
1027 hippocampus. *Hippocampus*, 22(3), 389–398. <https://doi.org/10.1002/hipo.20933>
- 1028 Exton-McGuinness, M. T. J., Lee, J. L. C., & Reichelt, A. C. (2015). Updating memories—  
1029 The role of prediction errors in memory reconsolidation. *Behavioural Brain*  
1030 *Research*, 278, 375–384. <https://doi.org/10.1016/j.bbr.2014.10.011>
- 1031 Ferguson, K. A., & Cardin, J. A. (2020). Mechanisms underlying gain modulation in the  
1032 cortex. *Nature Reviews Neuroscience*, 21(2), 80–92.  
1033 <https://doi.org/10.1038/s41583-019-0253-y>
- 1034 Flinker, A., Chang, E. F., Kirsch, H. E., Barbaro, N. M., Crone, N. E., & Knight, R. T.  
1035 (2010). Single-Trial Speech Suppression of Auditory Cortex Activity in Humans.  
1036 *Journal of Neuroscience*, 30(49), 16643–16650.  
1037 <https://doi.org/10.1523/JNEUROSCI.1809-10.2010>
- 1038 Ford, J. M., Palzes, V. A., Roach, B. J., & Mathalon, D. H. (2014). Did I Do That?  
1039 Abnormal Predictive Processes in Schizophrenia When Button Pressing to Deliver a  
1040 Tone. *Schizophrenia Bulletin*, 40(4), 804–812.  
1041 <https://doi.org/10.1093/schbul/sbt072>
- 1042 Friston, K. (2005). A theory of cortical responses. *Philosophical Transactions of the Royal*  
1043 *Society B: Biological Sciences*, 360(1456), 815–836.  
1044 <https://doi.org/10.1098/rstb.2005.1622>
- 1045 Fu, C. H. Y., Vythelingum, G. N., Brammer, M. J., Williams, S. C. R., Amaro, E., Andrew,  
1046 C. M., Yágüez, L., van Haren, N. E. M., Matsumoto, K., & McGuire, P. K. (2006).  
1047 An fMRI Study of Verbal Self-monitoring: Neural Correlates of Auditory Verbal  
1048 Feedback. *Cerebral Cortex*, 16(7), 969–977. <https://doi.org/10.1093/cercor/bhj039>
- 1049 Gagnepain, P., Henson, R., Chételat, G., Desgranges, B., Lebreton, K., & Eustache, F.  
1050 (2011). Is Neocortical–Hippocampal Connectivity a Better Predictor of Subsequent  
1051 Recollection than Local Increases in Hippocampal Activity? New Insights on the  
1052 Role of Priming. *Journal of Cognitive Neuroscience*, 23(2), 391–403.  
1053 <https://doi.org/10.1162/jocn.2010.21454>
- 1054 Geng, J. J., Blumenfeld, Z., Tyson, T. L., & Minzenberg, M. J. (2015). Pupil diameter

Running head: SELF-GENERATION EFFECTS ON MEMORY

- 1055 reflects uncertainty in attentional selection during visual search. *Frontiers in Human*  
1056 *Neuroscience*, 9. <https://doi.org/10.3389/fnhum.2015.00435>
- 1057 Greve, A., Cooper, E., Kaula, A., Anderson, M. C., & Henson, R. (2017). Does prediction  
1058 error drive one-shot declarative learning? *Journal of Memory and Language*, 94,  
1059 149–165. <https://doi.org/10.1016/j.jml.2016.11.001>
- 1060 Halgren, E. (1991). Firing of human hippocampal units in relation to voluntary movements.  
1061 *Hippocampus*, 1(2), 153–161. <https://doi.org/10.1002/hipo.450010204>
- 1062 Han, N., Jack, B. N., Hughes, G., Elijah, R. B., & Whitford, T. J. (2021). Sensory  
1063 attenuation in the absence of movement: Differentiating motor action from sense of  
1064 agency. *Cortex*, 141, 436–448. <https://doi.org/10.1016/j.cortex.2021.04.010>
- 1065 Hashimoto, Y., & Sakai, K. L. (2003). Brain activations during conscious self-monitoring  
1066 of speech production with delayed auditory feedback: An fMRI study. *Human*  
1067 *Brain Mapping*, 20(1), 22–28. <https://doi.org/10.1002/hbm.10119>
- 1068 Hazemann, P., Audin, G., & Lille, F. (1975). Effect of voluntary self-paced movements  
1069 upon auditory and somatosensory evoked potentials in man.  
1070 *Electroencephalography and Clinical Neurophysiology*, 39(3), 247–254.  
1071 [https://doi.org/10.1016/0013-4694\(75\)90146-7](https://doi.org/10.1016/0013-4694(75)90146-7)
- 1072 Heilbron, M., & Chait, M. (2018). Great Expectations: Is there Evidence for Predictive  
1073 Coding in Auditory Cortex? *Neuroscience*, 389, 54–73.  
1074 <https://doi.org/10.1016/j.neuroscience.2017.07.061>
- 1075 Heinks-Maldonado, T. H., Mathalon, D. H., Gray, M., & Ford, J. M. (2005). Fine-tuning of  
1076 auditory cortex during speech production. *Psychophysiology*, 42(2), 180–190.  
1077 <https://doi.org/10.1111/j.1469-8986.2005.00272.x>
- 1078 Henson, R. N., & Gagnepain, P. (2010). Predictive, interactive multiple memory systems.  
1079 *Hippocampus*, 20(11), 1315–1326. <https://doi.org/10.1002/hipo.20857>
- 1080 Hesse, M. D., Nishitani, N., Fink, G. R., Jousmaki, V., & Hari, R. (2010). Attenuation of  
1081 Somatosensory Responses to Self-Produced Tactile Stimulation. *Cerebral Cortex*,  
1082 20(2), 425–432. <https://doi.org/10.1093/cercor/bhp110>
- 1083 Hindy, N. C., Ng, F. Y., & Turk-Browne, N. B. (2016). Linking pattern completion in the  
1084 hippocampus to predictive coding in visual cortex. *Nature Neuroscience*, 19(5),  
1085 665–667. <https://doi.org/10.1038/nn.4284>

Running head: SELF-GENERATION EFFECTS ON MEMORY

- 1086 Hoeks, B., & Levelt, W. J. M. (1993). Pupillary dilation as a measure of attention: A  
1087 quantitative system analysis. *Behavior Research Methods, Instruments, &*  
1088 *Computers*, 25(1), 16–26. <https://doi.org/10.3758/BF03204445>
- 1089 Horváth, J. (2013a). Attenuation of auditory ERPs to action-sound coincidences is not  
1090 explained by voluntary allocation of attention: Action-sound coincidence effect is  
1091 not attentional. *Psychophysiology*, 50(3), 266–273.  
1092 <https://doi.org/10.1111/psyp.12009>
- 1093 Horváth, J. (2013b). Action-sound coincidence-related attenuation of auditory ERPs is not  
1094 modulated by affordance compatibility. *Biological Psychology*, 93(1), 81–87.  
1095 <https://doi.org/10.1016/j.biopsycho.2012.12.008>
- 1096 Horváth, J. (2015). Action-related auditory ERP attenuation: Paradigms and hypotheses.  
1097 *Brain Research*, 1626, 54–65. <https://doi.org/10.1016/j.brainres.2015.03.038>
- 1098 Horváth, J., Maess, B., Baess, P., & Tóth, A. (2012). Action–Sound Coincidences Suppress  
1099 Evoked Responses of the Human Auditory Cortex in EEG and MEG. *Journal of*  
1100 *Cognitive Neuroscience*, 24(9), 1919–1931. [https://doi.org/10.1162/jocn\\_a\\_00215](https://doi.org/10.1162/jocn_a_00215)
- 1101 Houde, J. F., Nagarajan, S. S., Sekihara, K., & Merzenich, M. M. (2002). Modulation of the  
1102 Auditory Cortex during Speech: An MEG Study. *Journal of Cognitive*  
1103 *Neuroscience*, 14(8), 1125–1138. <https://doi.org/10.1162/089892902760807140>
- 1104 Hughes, G., & Waszak, F. (2011). ERP correlates of action effect prediction and visual  
1105 sensory attenuation in voluntary action. *NeuroImage*, 56(3), 1632–1640.  
1106 <https://doi.org/10.1016/j.neuroimage.2011.02.057>
- 1107 Hupe, J. M., Lamirel, C., & Lorenceau, J. (2009). Pupil dynamics during bistable motion  
1108 perception. *Journal of Vision*, 9(7), 10–10. <https://doi.org/10.1167/9.7.10>
- 1109 Joshi, S., Li, Y., Kalwani, R. M., & Gold, J. I. (2016). Relationships between Pupil  
1110 Diameter and Neuronal Activity in the Locus Coeruleus, Colliculi, and Cingulate  
1111 Cortex. *Neuron*, 89(1), 221–234. <https://doi.org/10.1016/j.neuron.2015.11.028>
- 1112 Kafkas, A., & Montaldi, D. (2015). The pupillary response discriminates between  
1113 subjective and objective familiarity and novelty. *Psychophysiology*, 52(10), 1305–  
1114 1316. <https://doi.org/10.1111/psyp.12471>
- 1115 Kaiser, J., & Schütz-Bosbach, S. (2018). Sensory attenuation of self-produced signals does  
1116 not rely on self-specific motor predictions. *European Journal of Neuroscience*,



Running head: SELF-GENERATION EFFECTS ON MEMORY

- 1117 47(11), 1303–1310. <https://doi.org/10.1111/ejn.13931>
- 1118 Kelley, D. B., & Bass, A. H. (2010). Neurobiology of vocal communication: Mechanisms  
1119 for sensorimotor integration and vocal patterning. *Current Opinion in*  
1120 *Neurobiology*, 20(6), 748–753. <https://doi.org/10.1016/j.conb.2010.08.007>
- 1121 Kilteni, K., Engeler, P., & Ehrsson, H. H. (2020). Efference Copy Is Necessary for the  
1122 Attenuation of Self-Generated Touch. *IScience*, 23(2), 100843.  
1123 <https://doi.org/10.1016/j.isci.2020.100843>
- 1124 Kim, A. J., Fitzgerald, J. K., & Maimon, G. (2015). Cellular evidence for efference copy in  
1125 *Drosophila* visuomotor processing. *Nature Neuroscience*, 18(9), 1247–1255.  
1126 <https://doi.org/10.1038/nn.4083>
- 1127 Kim, G., Lewis-Peacock, J. A., Norman, K. A., & Turk-Browne, N. B. (2014). Pruning of  
1128 memories by context-based prediction error. *Proceedings of the National Academy*  
1129 *of Sciences*, 111(24), 8997–9002. <https://doi.org/10.1073/pnas.1319438111>
- 1130 Kim, J.-H., Jung, A.-H., Jeong, D., Choi, I., Kim, K., Shin, S., Kim, S. J., & Lee, S.-H.  
1131 (2016). Selectivity of Neuromodulatory Projections from the Basal Forebrain and  
1132 Locus Ceruleus to Primary Sensory Cortices. *The Journal of Neuroscience*, 36(19),  
1133 5314–5327. <https://doi.org/10.1523/JNEUROSCI.4333-15.2016>
- 1134 Kirwan, C. B., & Stark, C. E. L. (2007). Overcoming interference: An fMRI investigation  
1135 of pattern separation in the medial temporal lobe. *Learning & Memory*, 14(9),  
1136 625–633. <https://doi.org/10.1101/lm.663507>
- 1137 Klaffehn, A. L., Baess, P., Kunde, W., & Pfister, R. (2019). Sensory attenuation prevails  
1138 when controlling for temporal predictability of self- and externally generated tones.  
1139 *Neuropsychologia*, 132, 107145.  
1140 <https://doi.org/10.1016/j.neuropsychologia.2019.107145>
- 1141 Knapen, T., de Gee, J. W., Brascamp, J., Nuiten, S., Hoppenbrouwers, S., & Theeuwes, J.  
1142 (2016). Cognitive and Ocular Factors Jointly Determine Pupil Responses under  
1143 Equiluminance. *PLOS ONE*, 11(5), e0155574.  
1144 <https://doi.org/10.1371/journal.pone.0155574>
- 1145 Knight, R. T. (1996). Contribution of human hippocampal region to novelty detection.  
1146 *Nature*, 383(6597), 256–259. <https://doi.org/10.1038/383256a0>
- 1147 Knolle, F., Schröger, E., & Kotz, S. A. (2013a). Prediction errors in self- and externally-



Running head: SELF-GENERATION EFFECTS ON MEMORY

- 1148 generated deviants. *Biological Psychology*, 92(2), 410–416.  
1149 <https://doi.org/10.1016/j.biopsycho.2012.11.017>
- 1150 Knolle, F., Schröger, E., & Kotz, S. A. (2013b). Cerebellar contribution to the prediction of  
1151 self-initiated sounds. *Cortex*, 49(9), 2449–2461.  
1152 <https://doi.org/10.1016/j.cortex.2012.12.012>
- 1153 Kok, A. (2001). On the utility of P3 amplitude as a measure of processing capacity.  
1154 *Psychophysiology*, 38(3), 557–577. <https://doi.org/10.1017/S0048577201990559>
- 1155 Korka, B., Schröger, E., & Widmann, A. (2019). Action Intention-based and Stimulus  
1156 Regularity-based Predictions: Same or Different? *Journal of Cognitive*  
1157 *Neuroscience*, 31(12), 1917–1932. [https://doi.org/10.1162/jocn\\_a\\_01456](https://doi.org/10.1162/jocn_a_01456)
- 1158 Korka, B., Schröger, E., & Widmann, A. (2020). What *exactly* is missing here? The sensory  
1159 processing of unpredictable omissions is modulated by the specificity of expected  
1160 action-effects. *European Journal of Neuroscience*, 52(12), 4667–4683.  
1161 <https://doi.org/10.1111/ejn.14899>
- 1162 Krawczyk, M. C., Fernández, R. S., Pedreira, M. E., & Boccia, M. M. (2017). Toward a  
1163 better understanding on the role of prediction error on memory processes: From  
1164 bench to clinic. *Neurobiology of Learning and Memory*, 142, 13–20.  
1165 <https://doi.org/10.1016/j.nlm.2016.12.011>
- 1166 Kühn, S., Nenchev, I., Haggard, P., Brass, M., Gallinat, J., & Voss, M. (2011). Whodunnit?  
1167 Electrophysiological Correlates of Agency Judgements. *PLoS ONE*, 6(12), e28657.  
1168 <https://doi.org/10.1371/journal.pone.0028657>
- 1169 Lee, C. R., & Margolis, D. J. (2016). Pupil Dynamics Reflect Behavioral Choice and  
1170 Learning in a Go/NoGo Tactile Decision-Making Task in Mice. *Frontiers in*  
1171 *Behavioral Neuroscience*, 10. <https://doi.org/10.3389/fnbeh.2016.00200>
- 1172 Lee, M. D., & Wagenmakers, E.-J. (2013). *Bayesian Cognitive Modeling: A Practical*  
1173 *Course*. Cambridge University Press. <https://doi.org/10.1017/CBO9781139087759>
- 1174 Li, S., Cullen, W. K., Anwyl, R., & Rowan, M. J. (2003). Dopamine-dependent facilitation  
1175 of LTP induction in hippocampal CA1 by exposure to spatial novelty. *Nature*  
1176 *Neuroscience*, 6(5), 526–531. <https://doi.org/10.1038/nn1049>
- 1177 Lubinus, C., Einhäuser, W., Schiller, F., Kircher, T., Straube, B., & van Kemenade, B. M.  
1178 (2021). *Action-based predictions affect visual perception, neural processing, and*

Running head: SELF-GENERATION EFFECTS ON MEMORY

- 1179 *pupil size, regardless of temporal predictability* [Preprint]. *Neuroscience*.  
1180 <https://doi.org/10.1101/2021.02.11.430717>
- 1181 MacDonald, P. A., & MacLeod, C. M. (1998). The influence of attention at encoding on  
1182 direct and indirect remembering. *Acta Psychologica*, *98*(2–3), 291–310.  
1183 [https://doi.org/10.1016/S0001-6918\(97\)00047-4](https://doi.org/10.1016/S0001-6918(97)00047-4)
- 1184 Makeig, S., Müller, M. M., & Rockstroh, B. (1996). Effects of voluntary movements on  
1185 early auditory brain responses. *Experimental Brain Research*, *110*(3).  
1186 <https://doi.org/10.1007/BF00229149>
- 1187 Mama, Y., & Icht, M. (2016). Auditioning the distinctiveness account: Expanding the  
1188 production effect to the auditory modality reveals the superiority of writing over  
1189 vocalising. *Memory*, *24*(1), 98–113. <https://doi.org/10.1080/09658211.2014.986135>
- 1190 Martikainen, M. H. (2004). Suppressed Responses to Self-triggered Sounds in the Human  
1191 Auditory Cortex. *Cerebral Cortex*, *15*(3), 299–302.  
1192 <https://doi.org/10.1093/cercor/bhh131>
- 1193 Marzecová, A., Schettino, A., Widmann, A., SanMiguel, I., Kotz, S. A., & Schröger, E.  
1194 (2018). Attentional gain is modulated by probabilistic feature expectations in a  
1195 spatial cueing task: ERP evidence. *Scientific Reports*, *8*(1), 54.  
1196 <https://doi.org/10.1038/s41598-017-18347-1>
- 1197 McBurney-Lin, J., Lu, J., Zuo, Y., & Yang, H. (2019). Locus coeruleus-norepinephrine  
1198 modulation of sensory processing and perception: A focused review. *Neuroscience*  
1199 *& Biobehavioral Reviews*, *105*, 190–199.  
1200 <https://doi.org/10.1016/j.neubiorev.2019.06.009>
- 1201 McGinley, M. J., David, S. V., & McCormick, D. A. (2015). Cortical Membrane Potential  
1202 Signature of Optimal States for Sensory Signal Detection. *Neuron*, *87*(1), 179–192.  
1203 <https://doi.org/10.1016/j.neuron.2015.05.038>
- 1204 Mifsud, N. G., Beesley, T., Watson, T. L., Elijah, R. B., Sharp, T. S., & Whitford, T. J.  
1205 (2018). Attenuation of visual evoked responses to hand and saccade-initiated  
1206 flashes. *Cognition*, *179*, 14–22. <https://doi.org/10.1016/j.cognition.2018.06.005>
- 1207 Mondor, T. A., & Morin, S. R. (2004). Primacy, Recency, and Suffix Effects in Auditory  
1208 Short-Term Memory for Pure Tones: Evidence From a Probe Recognition  
1209 Paradigm. *Canadian Journal of Experimental Psychology/Revue Canadienne de*

Running head: SELF-GENERATION EFFECTS ON MEMORY

- 1210 *Psychologie Expérimentale*, 58(3), 206–219. <https://doi.org/10.1037/h0087445>
- 1211 Mukamel, R., Ekstrom, A. D., Kaplan, J., Iacoboni, M., & Fried, I. (2010). Single-Neuron  
1212 Responses in Humans during Execution and Observation of Actions. *Current*  
1213 *Biology*, 20(8), 750–756. <https://doi.org/10.1016/j.cub.2010.02.045>
- 1214 Murphy, P. R., O’Connell, R. G., O’Sullivan, M., Robertson, I. H., & Balsters, J. H. (2014).  
1215 Pupil diameter covaries with BOLD activity in human locus coeruleus. *Human*  
1216 *Brain Mapping*, 35(8), 4140–4154. <https://doi.org/10.1002/hbm.22466>
- 1217 Murphy, P. R., Vandekerckhove, J., & Nieuwenhuis, S. (2014). Pupil-Linked Arousal  
1218 Determines Variability in Perceptual Decision Making. *PLoS Computational*  
1219 *Biology*, 10(9), e1003854. <https://doi.org/10.1371/journal.pcbi.1003854>
- 1220 Näätänen, R., & Picton, T. (1987). The N1 Wave of the Human Electric and Magnetic  
1221 Response to Sound: A Review and an Analysis of the Component Structure.  
1222 *Psychophysiology*, 24(4), 375–425. [https://doi.org/10.1111/j.1469-](https://doi.org/10.1111/j.1469-8986.1987.tb00311.x)  
1223 [8986.1987.tb00311.x](https://doi.org/10.1111/j.1469-8986.1987.tb00311.x)
- 1224 Naber, M., Frassle, S., Rutishauser, U., & Einhauser, W. (2013). Pupil size signals novelty  
1225 and predicts later retrieval success for declarative memories of natural scenes.  
1226 *Journal of Vision*, 13(2), 11–11. <https://doi.org/10.1167/13.2.11>
- 1227 Nassar, M. R., Rumsey, K. M., Wilson, R. C., Parikh, K., Heasley, B., & Gold, J. I. (2012).  
1228 Rational regulation of learning dynamics by pupil-linked arousal systems. *Nature*  
1229 *Neuroscience*, 15(7), 1040–1046. <https://doi.org/10.1038/nn.3130>
- 1230 Nelson, A., & Mooney, R. (2016). The Basal Forebrain and Motor Cortex Provide  
1231 Convergent yet Distinct Movement-Related Inputs to the Auditory Cortex. *Neuron*,  
1232 90(3), 635–648. <https://doi.org/10.1016/j.neuron.2016.03.031>
- 1233 Norman, K. A. (2010). How hippocampus and cortex contribute to recognition memory:  
1234 Revisiting the complementary learning systems model. *Hippocampus*, 20(11),  
1235 1217–1227. <https://doi.org/10.1002/hipo.20855>
- 1236 Numminen, J., Salmelin, R., & Hari, R. (1999). Subject’s own speech reduces reactivity of  
1237 the human auditory cortex. *Neuroscience Letters*, 265(2), 119–122.  
1238 [https://doi.org/10.1016/S0304-3940\(99\)00218-9](https://doi.org/10.1016/S0304-3940(99)00218-9)
- 1239 Onton, J., & Makeig, S. (2006). Information-based modeling of event-related brain  
1240 dynamics. In *Progress in Brain Research* (Vol. 159, pp. 99–120). Elsevier.

Running head: SELF-GENERATION EFFECTS ON MEMORY

- 1241 [https://doi.org/10.1016/S0079-6123\(06\)59007-7](https://doi.org/10.1016/S0079-6123(06)59007-7)
- 1242 Oostenveld, R., Fries, P., Maris, E., & Schoffelen, J.-M. (2011). FieldTrip: Open Source  
1243 Software for Advanced Analysis of MEG, EEG, and Invasive Electrophysiological  
1244 Data. *Computational Intelligence and Neuroscience*, 2011, 1–9.  
1245 <https://doi.org/10.1155/2011/156869>
- 1246 Oostenveld, R., & Praamstra, P. (2001). The five percent electrode system for high-  
1247 resolution EEG and ERP measurements. *Clinical Neurophysiology*, 112(4), 713–  
1248 719. [https://doi.org/10.1016/S1388-2457\(00\)00527-7](https://doi.org/10.1016/S1388-2457(00)00527-7)
- 1249 Ozubko, J. D., Gopie, N., & MacLeod, C. M. (2012). Production benefits both recollection  
1250 and familiarity. *Memory & Cognition*, 40(3), 326–338.  
1251 <https://doi.org/10.3758/s13421-011-0165-1>
- 1252 Pantev, C., Eulitz, C., Hampson, S., Ross, B., & Roberts, L. E. (1996). The Auditory  
1253 Evoked “Off” Response: Sources and Comparison with the “On” and the  
1254 “Sustained” Responses. *Ear and Hearing*, 17(3), 255–265.  
1255 <https://doi.org/10.1097/00003446-199606000-00008>
- 1256 Pine, A., Sadeh, N., Ben-Yakov, A., Dudai, Y., & Mendelsohn, A. (2018). Knowledge  
1257 acquisition is governed by striatal prediction errors. *Nature Communications*, 9(1),  
1258 1673. <https://doi.org/10.1038/s41467-018-03992-5>
- 1259 Polich, J. (2007). Updating P300: An integrative theory of P3a and P3b. *Clinical*  
1260 *Neurophysiology*, 118(10), 2128–2148. <https://doi.org/10.1016/j.clinph.2007.04.019>
- 1261 Press, C., & Cook, R. (2015). Beyond action-specific simulation: Domain-general motor  
1262 contributions to perception. *Trends in Cognitive Sciences*, 19(4), 176–178.  
1263 <https://doi.org/10.1016/j.tics.2015.01.006>
- 1264 Press, C., Kok, P., & Yon, D. (2020). The Perceptual Prediction Paradox. *Trends in*  
1265 *Cognitive Sciences*, 24(1), 13–24. <https://doi.org/10.1016/j.tics.2019.11.003>
- 1266 Preuschoff, K. (2011). Pupil dilation signals surprise: Evidence for noradrenaline’s role in  
1267 decision making. *Frontiers in Neuroscience*, 5.  
1268 <https://doi.org/10.3389/fnins.2011.00115>
- 1269 Pyasik, M., Burin, D., & Pia, L. (2018). On the relation between body ownership and sense  
1270 of agency: A link at the level of sensory-related signals. *Acta Psychologica*, 185,  
1271 219–228. <https://doi.org/10.1016/j.actpsy.2018.03.001>

Running head: SELF-GENERATION EFFECTS ON MEMORY

- 1272 Reimer, J., Froudarakis, E., Cadwell, C. R., Yatsenko, D., Denfield, G. H., & Tolias, A. S.  
1273 (2014). Pupil Fluctuations Track Fast Switching of Cortical States during Quiet  
1274 Wakefulness. *Neuron*, *84*(2), 355–362.  
1275 <https://doi.org/10.1016/j.neuron.2014.09.033>
- 1276 Requarth, T., & Sawtell, N. B. (2011). Neural mechanisms for filtering self-generated  
1277 sensory signals in cerebellum-like circuits. *Current Opinion in Neurobiology*, *21*(4),  
1278 602–608. <https://doi.org/10.1016/j.conb.2011.05.031>
- 1279 Rescorla, R. A., & Wagner, A. R. (1972). A Theory of Pavlovian Conditioning: Variations  
1280 in the Effectiveness of Reinforcement and Nonreinforcement. In A. H. Black, & W.  
1281 F. Prokasy (Eds.), *Classical Conditioning II: Current Research and Theory* (pp. 64-  
1282 99). New York: Appleton- Century-Crofts.
- 1283 Richer, F., & Beatty, J. (1987). Contrasting Effects of Response Uncertainty on the Task-  
1284 Evoked Pupillary Response and Reaction Time. *Psychophysiology*, *24*(3), 258–262.  
1285 <https://doi.org/10.1111/j.1469-8986.1987.tb00291.x>
- 1286 Ross, J., Morrone, M. C., Goldberg, M. E., & Burr, D. C. (2001). Changes in visual  
1287 perception at the time of saccades. *Trends in Neurosciences*, *24*(2), 113–121.  
1288 [https://doi.org/10.1016/S0166-2236\(00\)01685-4](https://doi.org/10.1016/S0166-2236(00)01685-4)
- 1289 Rouder, J. N., Morey, R. D., Speckman, P. L., & Province, J. M. (2012). Default Bayes  
1290 factors for ANOVA designs. *Journal of Mathematical Psychology*, *56*(5), 356–374.  
1291 <https://doi.org/10.1016/j.jmp.2012.08.001>
- 1292 Roussel, C., Hughes, G., & Waszak, F. (2013). A preactivation account of sensory  
1293 attenuation. *Neuropsychologia*, *51*(5), 922–929.  
1294 <https://doi.org/10.1016/j.neuropsychologia.2013.02.005>
- 1295 Roussel, C., Hughes, G., & Waszak, F. (2014). Action prediction modulates both  
1296 neurophysiological and psychophysical indices of sensory attenuation. *Frontiers in*  
1297 *Human Neuroscience*, *8*. <https://doi.org/10.3389/fnhum.2014.00115>
- 1298 Roy, J. E., & Cullen, K. E. (2001). Selective Processing of Vestibular Reafference during  
1299 Self-Generated Head Motion. *The Journal of Neuroscience*, *21*(6), 2131–2142.  
1300 <https://doi.org/10.1523/JNEUROSCI.21-06-02131.2001>
- 1301 Rummell, B. P., Klee, J. L., & Sigurdsson, T. (2016). Attenuation of Responses to Self-  
1302 Generated Sounds in Auditory Cortical Neurons. *The Journal of Neuroscience*,

Running head: SELF-GENERATION EFFECTS ON MEMORY

- 1303           36(47), 12010–12026. <https://doi.org/10.1523/JNEUROSCI.1564-16.2016>
- 1304 SanMiguel, I., Todd, J., & Schröger, E. (2013). Sensory suppression effects to self-initiated  
1305 sounds reflect the attenuation of the unspecific N1 component of the auditory ERP:  
1306 Auditory N1 suppression: N1 components. *Psychophysiology*, 50(4), 334–343.  
1307 <https://doi.org/10.1111/psyp.12024>
- 1308 Saupe, K., Widmann, A., Trujillo-Barreto, N. J., & Schröger, E. (2013). Sensorial  
1309 suppression of self-generated sounds and its dependence on attention. *International*  
1310 *Journal of Psychophysiology*, 90(3), 300–310.  
1311 <https://doi.org/10.1016/j.ijpsycho.2013.09.006>
- 1312 Schafer, E. W. P., & Marcus, M. M. (1973). Self-Stimulation Alters Human Sensory Brain  
1313 Responses. *Science*, 181(4095), 175–177.  
1314 <https://doi.org/10.1126/science.181.4095.175>
- 1315 Schapiro, A. C., Turk-Browne, N. B., Botvinick, M. M., & Norman, K. A. (2017).  
1316 Complementary learning systems within the hippocampus: A neural network  
1317 modelling approach to reconciling episodic memory with statistical learning.  
1318 *Philosophical Transactions of the Royal Society B: Biological Sciences*, 372(1711),  
1319 20160049. <https://doi.org/10.1098/rstb.2016.0049>
- 1320 Schiffer, A.-M., Ahlheim, C., Wurm, M. F., & Schubotz, R. I. (2012). Surprised at All the  
1321 Entropy: Hippocampal, Caudate and Midbrain Contributions to Learning from  
1322 Prediction Errors. *PLoS ONE*, 7(5), e36445.  
1323 <https://doi.org/10.1371/journal.pone.0036445>
- 1324 Schneider, D. M. (2020). Reflections of action in sensory cortex. *Current Opinion in*  
1325 *Neurobiology*, 64, 53–59. <https://doi.org/10.1016/j.conb.2020.02.004>
- 1326 Schneider, D. M., & Mooney, R. (2018). How Movement Modulates Hearing. *Annual*  
1327 *Review of Neuroscience*, 41(1), 553–572. [https://doi.org/10.1146/annurev-neuro-](https://doi.org/10.1146/annurev-neuro-072116-031215)  
1328 [072116-031215](https://doi.org/10.1146/annurev-neuro-072116-031215)
- 1329 Schneider, D. M., Nelson, A., & Mooney, R. (2014). A synaptic and circuit basis for  
1330 corollary discharge in the auditory cortex. *Nature*, 513(7517), 189–194.  
1331 <https://doi.org/10.1038/nature13724>
- 1332 Schröger, E., Marzecová, A., & SanMiguel, I. (2015). Attention and prediction in human  
1333 audition: A lesson from cognitive psychophysiology. *European Journal of*



Running head: SELF-GENERATION EFFECTS ON MEMORY

- 1334 *Neuroscience*, 41(5), 641–664. <https://doi.org/10.1111/ejn.12816>
- 1335 Shahin, A., Roberts, L. E., Pantev, C., Trainor, L. J., & Ross, B. (2005). Modulation of P2  
1336 auditory-evoked responses by the spectral complexity of musical sounds.  
1337 *NeuroReport*, 16(16), 1781–1785.  
1338 <https://doi.org/10.1097/01.wnr.0000185017.29316.63>
- 1339 Simpson, H. M. (1969). Effects of a task-relevant response on pupil size.  
1340 *Psychophysiology*, 6(2), 115–121. [https://doi.org/10.1111/j.1469-](https://doi.org/10.1111/j.1469-8986.1969.tb02890.x)  
1341 [8986.1969.tb02890.x](https://doi.org/10.1111/j.1469-8986.1969.tb02890.x)
- 1342 Sinclair, A. H., & Barense, M. D. (2019). Prediction Error and Memory Reactivation: How  
1343 Incomplete Reminders Drive Reconsolidation. *Trends in Neurosciences*, 42(10),  
1344 727–739. <https://doi.org/10.1016/j.tins.2019.08.007>
- 1345 Sperry, R. W. (1950). Neural basis of the spontaneous optokinetic response produced by  
1346 visual inversion. *Journal of Comparative and Physiological Psychology*, 43(6),  
1347 482–489. <https://doi.org/10.1037/h0055479>
- 1348 Stern, C. E., Corkin, S., Gonzalez, R. G., Guimaraes, A. R., Baker, J. R., Jennings, P. J.,  
1349 Carr, C. A., Sugiura, R. M., Vedantham, V., & Rosen, B. R. (1996). The  
1350 hippocampal formation participates in novel picture encoding: Evidence from  
1351 functional magnetic resonance imaging. *Proceedings of the National Academy of*  
1352 *Sciences*, 93(16), 8660–8665. <https://doi.org/10.1073/pnas.93.16.8660>
- 1353 Strauch, C., Koniakowsky, I., & Huckauf, A. (2020). Decision Making and Oddball Effects  
1354 on Pupil Size: Evidence for a Sequential Process. *Journal of Cognition*, 3(1), 7.  
1355 <https://doi.org/10.5334/joc.96>
- 1356 Stringer, C., Pachitariu, M., Steinmetz, N., Reddy, C. B., Carandini, M., & Harris, K. D.  
1357 (2019). Spontaneous behaviors drive multidimensional, brainwide activity. *Science*,  
1358 364(6437), eaav7893. <https://doi.org/10.1126/science.aav7893>
- 1359 Tapia, M. C., Cohen, L. G., & Starr, A. (1987). Attenuation of Auditory-Evoked Potentials  
1360 during Voluntary Movement in Man. *International Journal of Audiology*, 26(6),  
1361 369–373. <https://doi.org/10.3109/00206098709081565>
- 1362 Timm, J., SanMiguel, I., Saupe, K., & Schröger, E. (2013). The N1-suppression effect for  
1363 self-initiated sounds is independent of attention. *BMC Neuroscience*, 14(1), 2.  
1364 <https://doi.org/10.1186/1471-2202-14-2>



Running head: SELF-GENERATION EFFECTS ON MEMORY

- 1365 Timm, J., Schönwiesner, M., Schröger, E., & SanMiguel, I. (2016). Sensory suppression of  
1366 brain responses to self-generated sounds is observed with and without the  
1367 perception of agency. *Cortex*, *80*, 5–20.  
1368 <https://doi.org/10.1016/j.cortex.2016.03.018>
- 1369 Tonnuquist-Uhlen, I., Ponton, C. W., Eggermont, J. J., Kwong, B., & Don, M. (2003).  
1370 Maturation of human central auditory system activity: The T-complex. *Clinical*  
1371 *Neurophysiology*, *114*(4), 685–701. [https://doi.org/10.1016/S1388-2457\(03\)00005-](https://doi.org/10.1016/S1388-2457(03)00005-1)  
1372 [1](https://doi.org/10.1016/S1388-2457(03)00005-1)
- 1373 Twomey, D. M., Murphy, P. R., Kelly, S. P., & O’Connell, R. G. (2015). The classic P300  
1374 encodes a build-to-threshold decision variable. *European Journal of Neuroscience*,  
1375 *42*(1), 1636–1643. <https://doi.org/10.1111/ejn.12936>
- 1376 Urai, A. E., Braun, A., & Donner, T. H. (2017). Pupil-linked arousal is driven by decision  
1377 uncertainty and alters serial choice bias. *Nature Communications*, *8*(1), 14637.  
1378 <https://doi.org/10.1038/ncomms14637>
- 1379 Van Slooten, J. C., Jahfari, S., Knapen, T., & Theeuwes, J. (2019). Correction: How pupil  
1380 responses track value-based decision-making during and after reinforcement  
1381 learning. *PLOS Computational Biology*, *15*(5), e1007031.  
1382 <https://doi.org/10.1371/journal.pcbi.1007031>
- 1383 Vinck, M., Batista-Brito, R., Knoblich, U., & Cardin, J. A. (2015). Arousal and  
1384 Locomotion Make Distinct Contributions to Cortical Activity Patterns and Visual  
1385 Encoding. *Neuron*, *86*(3), 740–754. <https://doi.org/10.1016/j.neuron.2015.03.028>
- 1386 von Holst, E. (1954). Relations between the central Nervous System and the peripheral  
1387 organs. *The British Journal of Animal Behaviour*, *2*(3), 89–94.  
1388 [https://doi.org/10.1016/S0950-5601\(54\)80044-X](https://doi.org/10.1016/S0950-5601(54)80044-X)
- 1389 Weller, L., Schwarz, K. A., Kunde, W., & Pfister, R. (2017). Was it me? – Filling the  
1390 interval between action and effects increases agency but not sensory attenuation.  
1391 *Biological Psychology*, *123*, 241–249.  
1392 <https://doi.org/10.1016/j.biopsycho.2016.12.015>
- 1393 Williams, S. R., Shenasa, J., & Chapman, C. E. (1998). Time Course and Magnitude of  
1394 Movement-Related Gating of Tactile Detection in Humans. I. Importance of  
1395 Stimulus Location. *Journal of Neurophysiology*, *79*(2), 947–963.

Running head: SELF-GENERATION EFFECTS ON MEMORY

- 1396 <https://doi.org/10.1152/jn.1998.79.2.947>
- 1397 Wolpaw, J. R., & Penry, J. K. (1975). A temporal component of the auditory evoked  
1398 response. *Electroencephalography and Clinical Neurophysiology*, 39(6), 609–620.  
1399 [https://doi.org/10.1016/0013-4694\(75\)90073-5](https://doi.org/10.1016/0013-4694(75)90073-5)
- 1400 Wolpert, D., Ghahramani, Z., & Jordan, M. (1995). An internal model for sensorimotor  
1401 integration. *Science*, 269(5232), 1880–1882.  
1402 <https://doi.org/10.1126/science.7569931>
- 1403 Yebra, M., Galarza-Vallejo, A., Soto-Leon, V., Gonzalez-Rosa, J. J., de Berker, A. O.,  
1404 Bestmann, S., Oliviero, A., Kroes, M. C. W., & Strange, B. A. (2019). Action  
1405 boosts episodic memory encoding in humans via engagement of a noradrenergic  
1406 system. *Nature Communications*, 10(1), 3534. [https://doi.org/10.1038/s41467-019-](https://doi.org/10.1038/s41467-019-11358-8)  
1407 [11358-8](https://doi.org/10.1038/s41467-019-11358-8)
- 1408 Yerkes, R. M., & Dodson, J. D. (1908). The relation of strength of stimulus to rapidity of  
1409 habit-formation. *Journal of Comparative Neurology and Psychology*, 18(5), 459–  
1410 482. <https://doi.org/10.1002/cne.920180503>
- 1411
